## 22 SUMMARY

23 Microalgal oils in the form of triacylglycerols (TAGs) are broadly used as nutritional  
24 supplements and biofuels. Diacylglycerol acyltransferase (DGAT) catalyzes the final step of  
25 acyl-CoA-dependent biosynthesis of TAG and is considered a key target for manipulating oil  
26 production. Although a growing number of *DGAT1*s have been identified and over-expressed in  
27 some algal species, the detailed structure-function relationship, as well as the improvement of  
28 DGAT1 performance via protein engineering, remain largely untapped. Here, we explored the  
29 structure-function features of the hydrophilic N-terminal domain of DGAT1 from the green  
30 microalga *Chromochloris zofingiensis* (CzDGAT1). The results indicated that the N-terminal  
31 domain of CzDGAT1 was less disordered than those of the higher eukaryotic enzymes and its  
32 partial truncation or complete removal could substantially decrease enzyme activity, suggesting  
33 its possible role in maintaining enzyme performance. Although the N-terminal domains of  
34 animal and plant DGAT1s were previously found to bind acyl-CoAs, replacement of CzDGAT1  
35 N-terminus by an acyl-CoA binding protein (ACBP) could not restore enzyme activity.  
36 Interestingly, the fusion of ACBP to the N-terminus of the full-length CzDGAT1 could enhance  
37 the enzyme affinity for acyl-CoAs and augment protein accumulation levels, which ultimately  
38 drove oil accumulation in yeast cells and tobacco leaves to higher levels than the full-length  
39 CzDGAT1. Overall, our findings unravel the distinct features of the N-terminus of algal DGAT1  
40 and provide a strategy to engineer enhanced performance in DGAT1 via protein fusion, which  
41 may open a vista in generating improved membrane-bound acyl-CoA-dependent enzymes and  
42 boosting oil biosynthesis in plants and oleaginous microorganisms.

43

44 **KEYWORDS:** Triacylglycerol biosynthesis, DGAT, acyl-CoA binding protein, algal lipid,  
45 enzyme kinetics, tobacco, yeast, *Chromochloris zofingiensis*

46

47 **SIGNIFICANCE STATEMENT**

48 Here, we explored the N-terminus of a microalgal DGAT1, a membrane-bound enzyme  
49 determining oil biosynthesis, using *in silico* analysis, truncation mutagenesis, protein fusion and  
50 *in vitro* and *in vivo* characterization, and demonstrated its distinct structure-function features  
51 from the higher eukaryotic enzymes. We further engineered enhanced performance in DGAT1  
52 via N-terminal fusion of ACBP, and obtained a kinetically improved enzyme with augmented  
53 protein production levels, which could boost oil accumulation in yeast and plant vegetative  
54 tissues.

## 55 INTRODUCTION

56 Plant-derived triacylglycerol (TAG) is one of the most abundant forms of energy storage and  
57 reduced carbon in nature, which has been widely used as food, feed and renewable feedstocks for  
58 industrial applications (Xu, Caldo, *et al.*, 2018). Microalgae hold the promise of a sustainable  
59 bioresource of TAG because of the high ability to accumulate lipids and less competition for  
60 arable land with food crops (Xu, Caldo, *et al.*, 2018; Hu *et al.*, 2008). In recent years, the  
61 emerging research interest in exploring the oil biosynthesis mechanisms in microalgae has  
62 opened an important vista to fulfil the potential of microalgal oil production via physiological  
63 and genetic manipulations.

64 In microalgae, TAG assembly typically occurs through acyl-CoA-dependent and acyl-  
65 CoA-independent pathways by a series of acyltransferases which are universally present in plants  
66 and animals (Xu, Caldo, *et al.*, 2018; Kong *et al.*, 2018). Among them, acyl-CoA:diacylglycerol  
67 acyltransferase (DGAT, EC 2.3.1.20) catalyzes the acylation of *sn*-1,2-diacylglycerol with acyl-  
68 CoA to produce TAG, which is the final committed step in the acyl-CoA-dependent TAG  
69 biosynthesis. DGAT appears to play a prominent role in affecting the flux of carbon into TAG in  
70 many oilseed crops (Liu *et al.*, 2012; Katavic *et al.*, 1995; Zou *et al.*, 1999; Weselake *et al.*, 2008)  
71 and has been regarded as an important target for manipulation. Two major forms of membrane-  
72 bound non-homologous DGAT, designated DGAT1 and DGAT2, are known to predominantly  
73 contribute to TAG formation in developing seeds and microalgae. In plants, DGAT1 is  
74 considered as a major player in seed oil accumulation in some oil crops, such as rapeseed  
75 (*Brassica napus*) and safflower (*Carthamus tinctorius*) (Rahman *et al.*, 2013; Tzen *et al.*, 1993;  
76 Weselake *et al.*, 1993), whereas DGAT2 appears to play a minor role in affecting oil production  
77 in oil crops. DGAT2, however, is important for incorporating unusual fatty acids into storage  
78 TAG in plants, such as tung tree (*Vernicia fordii*), castor (*Ricinus communis*), and ironweed  
79 (*Vernonia galamensis*) (Shockey *et al.*, 2006; Kroon *et al.*, 2006; Li *et al.*, 2010). In microalgae,  
80 on the other hand, one or two copies of *DGAT1* and several copies of *DGAT2* were found to  
81 likely contribute to the complexity of TAG formation, although their physiological roles remain  
82 ambiguous (Mao *et al.*, 2019; Chen and Smith, 2012; Gong *et al.*, 2013; Liu and Benning, 2013;  
83 Xu, Caldo, *et al.*, 2018; Turchetto-Zolet *et al.*, 2011; Liu *et al.*, 2016). Given the importance of  
84 the enzyme in governing the flux of substrates into TAG, over-expression of *DGAT* cDNAs have  
85 been used to manipulate oil production in the seeds of *Arabidopsis thaliana* and oilseed crops

86 such as soybean (*Glycine max*), *B. napus*, corn (*Zea mays*) and *Camelina sativa* (Jako *et al.*,  
87 2001; Weselake *et al.*, 2008; Roesler *et al.*, 2016; Kim *et al.*, 2016; Oakes *et al.*, 2011;  
88 Lardizabal *et al.*, 2008; Li *et al.*, 2012), in the leaves of *Nicotiana tabacum*, *N. benthamiana*, and  
89 *Z. mays* (Alameldin *et al.*, 2017; Bouvier-Navé *et al.*, 2000; Vanhercke *et al.*, 2017; Chen *et al.*,  
90 2017), and in oleaginous yeast (Greer *et al.*, 2015; Chen *et al.*, 2017) and several microalgae  
91 including *Chlamydomonas reinhardtii*, *Phaeodactylum tricorutum*, and *Nannochloropsis*  
92 *oceanica* (Zulu *et al.*, 2017; Xin *et al.*, 2017; Xin *et al.*, 2018; Mao *et al.*, 2019; Iwai *et al.*, 2014).

93 DGAT1 is an integral membrane protein with multiple transmembrane domains (TMD),  
94 the three-dimensional structure of which has not yet been elucidated (Xu, Caldo, *et al.*, 2018).  
95 DGAT1 shares common features among different organisms, containing a very variable  
96 hydrophilic N-terminus with possibly distinct functions and a conserved C-terminal region with  
97 8-10 predicted TMD (Liu *et al.*, 2012). The hydrophilic N-termini of *B. napus* and mouse (*Mus*  
98 *musculus*) DGAT1s have been found to be involved in acyl-CoA binding and self-association  
99 (Weselake *et al.*, 2006; Siloto *et al.*, 2008; McFie *et al.*, 2010). Recently, the structure of the N-  
100 terminal domain of *B. napus* DGAT1 was solved, revealing its important role as an enzyme  
101 regulatory domain that positively and negatively modulates enzyme activity (Caldo *et al.*, 2017).  
102 The N-terminal domain of *B. napus* DGAT1 consists of two different segments, an intrinsically  
103 disordered region encompassing an autoinhibitory motif and a folded segment containing the  
104 allosteric site for acyl-CoA and CoA for activation and feedback inhibition of the enzyme,  
105 respectively (Caldo *et al.*, 2017). Although DGAT1s have been characterized from a growing  
106 number of microalgal species (Kirchner *et al.*, 2016; Wei *et al.*, 2017; Guo *et al.*, 2017;  
107 Guihéneuf *et al.*, 2011), the structure-function features of algal DGAT1, as well as using the  
108 knowledge in improving DGAT performance, remain largely untapped.

109 The aim of this study, therefore, is to use a DGAT1 from *Chromochloris zofingiensis*  
110 (CzDGAT1), an emerging model green microalgal species for studying TAG and secondary  
111 carotenoid accumulation and industrial production, to explore the structure and function features  
112 of the N-terminal domain of green microalgal DGAT1 and to investigate the potential of protein  
113 fusion in improving DGAT1 performance. After comparing the evolutionary and structural  
114 features of algal DGAT1 with the higher eukaryotic enzymes, the function of the hydrophilic N-  
115 terminal domain of CzDGAT1 was examined via truncation mutagenesis, protein fusion and *in*  
116 *vitro* enzyme assay. This N-terminus was found to have very different features from those of the

117 plant and animal enzymes and is important for maintaining high DGAT1 activity but not  
118 essential for catalysis. The subsequent fusion of an *A. thaliana* acyl-CoA binding protein  
119 (AtACBP6) to the N-terminus of CzDGAT1 resulted in a kinetically improved enzyme with  
120 augmented protein production levels, and this improved DGAT1 variant could drive oil  
121 accumulation to higher levels than the native DGAT1 in yeast cells and *N. benthamiana* leaves.  
122 The results indicated the fusion of ACBP with DGAT1 may represent a promising strategy in  
123 engineering oil production in oleaginous organisms, which may also be used in engineering other  
124 membrane-bound acyl-CoA-dependent enzymes.

125

## 126 **RESULTS**

### 127 **CzDGAT1 is phylogenetically related to plant DGAT1**

128 Phylogenetic analysis was carried out with DGAT1s from *C. zoofingiensis* and other algae, plants  
129 and animals. The two reported full-length *CzDGAT1* sequences, sharing 39.9% amino acid  
130 pairwise identity, were both used in this analysis (Roth *et al.*, 2017; Mao *et al.*, 2019). As shown  
131 in Figure 1, the results revealed some interesting features from an evolutionary perspective.  
132 DGAT1s were found to be separated into four subgroups, with animal and plant DGAT1 falling  
133 into two separate groups. DGAT1 from the charophyte green alga *Klebsormidium nitens* is  
134 grouped with plant DGAT1, whereas CzDGAT1 and other DGAT1 from chlorophyte green  
135 algae form a separate group, which is closely related to the plant DGAT1 group. Diatom DGAT1,  
136 on the other hand, is clustered with fungal DGAT1 and is separate from all other sequences.

137 Further sequence analysis revealed that similar to plant and animal DGAT1s, the C-  
138 terminal portion of algal DGAT1s contains 7-10 predicted transmembrane domains and is the  
139 most conserved region, whereas the hydrophilic N-terminus preceding the first predicted  
140 transmembrane domain is less conserved and variable in length (Figures 1 and S1 and Table S1).  
141 Plant and animal DGAT1s have a hydrophilic N-terminus with a length of approximately 110  
142 and 94 amino acid residues, respectively. On the contrary, the N-terminus of the algal DGAT1  
143 has a quite variable length, ranging from 20 (*Chlorella vulgaris* DGAT1) to 326 amino acid  
144 residues (*Auxenochlorella protothecoides* DGAT1). One CzDGAT1 isoform (isoform  
145 CzDGAT1B in Mao *et al.*, 2019) has a N-terminus composed of 107 amino acid residues (Table

146 S1), which is similar to that of plant and animal DGAT1, and was used for subsequent  
147 experiments.

148

149 **CzDGAT1 encodes an active enzyme and has a hydrophilic N-terminus with less**  
150 **propensity to become disordered**

151 The functionality of CzDGAT1 was characterized using the yeast mutant H1246, which is  
152 devoid of TAG biosynthesis ability (Sandager *et al.*, 2002). The yeast complementation and fatty  
153 acid feeding assays showed that CzDGAT1 was able to restore TAG biosynthesis in  
154 *Saccharomyces cerevisiae* mutant H1246 (Figure 2A) and facilitated the incorporation of the  
155 exogenously fed linoleic acid (C18:2<sup>9cis,12cis</sup>, C18:2) and  $\alpha$ -linolenic acid (C18:3<sup>9cis,12cis,15cis</sup>,  
156 C18:3) into yeast TAG (Figure 2B). Further *in vitro* enzyme assay confirmed that CzDGAT1  
157 displayed a strong DGAT activity (Figure 2C).

158 The N-terminal region of plant DGAT1 has been found to serve important regulatory  
159 functions (Caldo *et al.*, 2017). The majority of the N-terminal hydrophilic region of plant and  
160 animal DGAT1 is likely present in a disordered state, whereas only a small portion preceding the  
161 first predicted transmembrane domain appears to have secondary structure (Figure 2D) (Caldo *et al.*  
162 *et al.*, 2017). To explore whether algal DGAT1 has similar features, the secondary structure of the  
163 N-terminal region of algal DGAT1 was analyzed using DISOPRED (Ward *et al.*, 2004).  
164 Interestingly, CzDGAT1 may have a very different profile in the N-terminus, where there is  
165 much less propensity to be disordered than that of *B. napus* DGAT1 (Figures 2E and F).  
166 Similarly, N-terminus with less disordered state was also predicted in DGAT1 from a few other  
167 algal species (Figure S2). On the other hand, algal DGAT1 with an extremely long N-terminus,  
168 such as DGAT1 from *K. nitens*, is predicted to have both disordered and less disordered N-  
169 terminal segments. Furthermore, the folded portion of the N-terminal region of DGAT1 has been  
170 found to contain an allosteric site for binding of acyl-CoA and/or CoA has been identified in *B.*  
171 *napus* DGAT1 (Caldo *et al.*, 2017). To test whether the N-terminus of algal DGAT1 also has the  
172 regulatory features, the N-terminal regions of DGAT1 from several plants, animal and algal  
173 species were aligned (Figure 2D). The four amino acid residues (R96, R97, R99 and E100 in *B.*  
174 *napus* DGAT1) implicated in CoA binding (Caldo *et al.*, 2017) appear to be highly conserved in  
175 plant and animal DGAT1 but not in algal DGAT1, in which only the third residue (R99) is



176 conserved. It should be noted that CzDGAT1 contains partial of the allosteric site in its N-  
177 terminus, where two out of the four amino acid residues involved in CoA binding are conserved  
178 (Figure 2D).

179

### 180 **N-terminal truncation of CzDGAT1 leads to less active enzymes**

181 Considering the partial conservation of the allosteric sites in the N-terminus of CzDGAT1, it is  
182 interesting to test whether the N-terminus of CzDGAT1 also serves an analogous function to the  
183 *B. napus* DGAT1 N-terminus in catalysis. CzDGAT1 is predicted to have a 107-amino acid  
184 residue-long hydrophilic N-terminal region, followed by 9 predicted hydrophobic segments  
185 (Figure 3A). To probe the possible role of the N-terminal region, the full-length CzDGAT1 and  
186 two N-terminal truncated versions were produced in *S. cerevisiae* mutant H1246 and the  
187 microsomal fractions containing the recombinant proteins were used to determine DGAT activity  
188 and protein production levels. Both the removal of the first 80 amino acid residues (CzDGAT1<sub>81-</sub>  
189 <sub>550</sub>), which roughly correspond to the intrinsically disordered region in the N-terminus of *B.*  
190 *napus* DGAT1 (Figure 2D), and the entire N-terminal region (CzDGAT1<sub>107-550</sub>) led to reduced  
191 enzyme production levels (Figure 3B) and enzyme specific activities (Figure 3C). The specific  
192 activity of each enzyme was then normalized by the corresponding protein production level and  
193 the normalized activities of CzDGAT1<sub>81-550</sub> and CzDGAT1<sub>107-550</sub> were about 10 and 120-fold  
194 lower than that of the full-length enzyme, respectively (Figure 3D). These results suggest that the  
195 first 80 amino acids are not dispensable for the enzyme activity, and the entire N-terminal  
196 domain may be important for maintaining high enzyme activity.

197

### 198 **Fusion with ACBP at the N-terminus of CzDGAT1 and its N-terminal truncation mutant** 199 **enhanced the enzyme production**

200 The acyl-CoA binding property of the N-terminal region has been revealed in *B. napus* DGAT1  
201 (Weselake *et al.*, 2006; Caldo *et al.*, 2017). Considering the removal of the entire N-terminus of  
202 CzDGAT1 led to a nearly inactive enzyme, we further explored whether the N-terminal fusion of  
203 CzDGAT1<sub>107-550</sub> with an ACBP would restore/improve the enzyme activity. We also tested if the  
204 fusion with ACBP could potentially improve DGAT performance by facilitating the channeling  
205 of acyl-CoA from the cytosol or the membrane lipid bilayer to the catalytic center of the enzyme.



206 To test these hypotheses, AtACBP6, a 10-kDa soluble protein, was fused at the N-termini of  
207 CzDGAT1, CzDGAT1<sub>81-550</sub> and CzDGAT1<sub>107-550</sub>, respectively, and the resulting fused proteins  
208 were produced in yeast H1246.

209 As shown in Figure 4A, N-terminal fusion with AtACBP6 largely increased the  
210 recombinant protein production in yeast, where the protein accumulation levels of AtACBP6  
211 fused CzDGAT1, CzDGAT1<sub>81-550</sub> and CzDGAT1<sub>107-550</sub> were 5, 14, and 28-fold higher than the  
212 corresponding unfused CzDGAT1 variants, respectively. The specific activities of the AtACBP6  
213 fused CzDGAT1 and CzDGAT1<sub>81-550</sub> were also improved to about 2 and 5-fold greater than the  
214 unfused enzymes, respectively (Figure 4B). N-terminal fusion of CzDGAT1<sub>107-550</sub> with  
215 AtACBP6, however, led to no improvement in enzyme activity compared to CzDGAT1<sub>107-550</sub>  
216 (Figure 4B). The normalized enzyme activities of AtACBP6 fused CzDGAT1 and CzDGAT1<sub>81-</sub>  
217 <sub>550</sub> were about 2.5 and 3-fold lower than the unfused enzymes, respectively (Figure 4C),  
218 suggesting that the enhanced enzyme activities of the fused proteins were mainly due to the  
219 enhanced protein abundance.

220

### 221 **N-terminal fusion with ACBP kinetically improves CzDGAT1 and its N-terminal** 222 **truncation mutant**

223 To further explore the effects of fusing ACBP with DGAT1, the activities of the full-length  
224 CzDGAT1, ACBP-fused full-length CzDGAT1, CzDGAT1<sub>81-550</sub>, and ACBP-fused CzDGAT1<sub>81-</sub>  
225 <sub>550</sub> were analyzed over increasing concentrations of oleoyl-CoA (Figures 5A-D). The full-length  
226 enzyme and the N-terminal truncation mutant had a similar response to the increasing acyl-donor  
227 concentration, with the maximum enzyme activity achieved at 5 and 7.5  $\mu$ M oleoyl-CoA,  
228 respectively. The ACBP-fused CzDGAT1<sub>1-550</sub> and CzDGAT1<sub>81-550</sub>, on the other hand, reached  
229 the maximum enzyme activity at lower concentrations at 3 and 5  $\mu$ M oleoyl-CoA, respectively.  
230 The substrate saturation curves for CzDGAT1<sub>1-550</sub> and CzDGAT1<sub>81-550</sub> and their ACBP-fused  
231 versions had better fits to the allosteric sigmoidal equation over the Michaelis-Menten equation  
232 (Figures 5A-D). The Hill coefficients of CzDGAT1<sub>1-550</sub>, ACBP-fused CzDGAT1, CzDGAT1<sub>81-</sub>  
233 <sub>550</sub> and ACBP-fused CzDGAT1<sub>81-550</sub> were  $1.39 \pm 0.06$ ,  $1.91 \pm 0.12$ ,  $1.71 \pm 0.06$ , and  $1.57 \pm 0.14$ ,  
234 respectively, which indicates that all these enzymes exhibited positive cooperativity. In addition,  
235 CzDGAT1<sub>1-550</sub> and CzDGAT1<sub>81-550</sub> had apparent  $S_{0.5}$  values of  $1.48 \pm 0.07$  and  $1.83 \pm 0.05$   $\mu$ M

236 oleoyl-CoA, respectively (Table 1), suggesting that the oleoyl-CoA affinity of CzDGAT1<sub>81-550</sub>  
237 might be lower than that of the full-length enzyme. Interestingly, ACBP-fused CzDGAT1<sub>1-550</sub>  
238 and ACBP-fused CzDGAT1<sub>81-550</sub> had apparent  $S_{0.5}$  values of  $0.94 \pm 0.04$  and  $1.50 \pm 0.10 \mu\text{M}$   
239 oleoyl-CoA, respectively, which are 1.6 and 1.2-fold lower than the values of the corresponding  
240 unfused enzymes (Table 1). This result suggests that fusion with ACBP could enhance the  
241 affinity of DGAT variants to oleoyl-CoA.

242

### 243 **N-terminal fusion with ACBP in CzDGAT1 boosts oil content in yeast and tobacco leaves**

244 In order to determine whether the ACBP fused CzDGAT1 variants can boost oil production to  
245 higher levels compared to the native enzyme, cDNAs encoding the full-length CzDGAT1, the N-  
246 terminal truncated and the ACBP fused versions were individually introduced into the yeast  
247 strain H1246. Expression of *ACBP* or *LacZ* and co-expression of *CzDGAT1*<sub>1-550</sub> or *CzDGAT1*<sub>81-  
248 550</sub> with *ACBP* in yeast were used as controls. The production of CzDGAT1<sub>1-550</sub> led to  
249 considerably increased neutral lipid accumulation in yeast at 24 h and 72 h, whereas no change  
250 in neutral lipid production was observed for the yeast expressing *CzDGAT1*<sub>81-550</sub> when compared  
251 to the *LacZ* control (Figure 6A). Fusion with ACBP at the N-terminal of CzDGAT1<sub>1-550</sub> but not  
252 the N-terminal truncated enzyme was able to further increase the neutral lipid content, resulting  
253 in about 2-fold higher production than the native enzyme (Figure 6A). It should be noted that co-  
254 expression of *ACBP* with *CzDGAT1*<sub>1-550</sub> also promoted neutral lipid production in yeast to a  
255 comparable level to ACBP-fused CzDGAT1<sub>1-550</sub> (Figure 6A), suggesting that ACBP may  
256 improve the acyl-CoA availability to DGAT and thus enhance the lipid production.

257 To further examine the effects of CzDGAT1 variants on oil production in plant  
258 vegetative tissues, cDNAs encoding CzDGAT1<sub>1-550</sub>, ACBP-fused CzDGAT1<sub>1-550</sub>, CzDGAT1<sub>81-  
259 550</sub> or ACBP-fused CzDGAT1<sub>81-550</sub> were transiently co-expressed with *A. thaliana Wrinkled1*  
260 (*AtWR11*) in the *N. benthamiana* leaves, respectively. *AtWR11* encodes a transcription factor  
261 involved in the upregulation of genes in late glycolysis and fatty-acid biosynthesis (Xu, Caldo, *et*  
262 *al.*, 2018) and co-expression of *AtWR11* and *DGAT1* was previously found to substantially  
263 increase the TAG production in *N. benthamiana* leaves (Vanhercke *et al.*, 2013). The over-  
264 expression of a cDNA encoding CzDGAT1<sub>1-550</sub> or ACBP-fused CzDGAT1<sub>1-550</sub> and the co-  
265 expression of *CzDGAT1*<sub>1-550</sub> and *ACBP* (*ACBP* + *DGAT1*<sub>1-550</sub>) led to considerable increases in

266 leaf TAG content compared with the expression of *AtWR11* alone (Figure 6B). Interestingly,  
267 ACBP-fused CzDGAT1<sub>1-550</sub> had a higher impact on improving the leaf TAG production than  
268 CzDGAT1<sub>1-550</sub> or the co-expression group (ACBP + DGAT1<sub>1-550</sub>), where a 1.40 or 1.35-fold  
269 increase in TAG content was observed, respectively (Figure 6B). Consistently, the TAG fatty  
270 acid composition was also affected in the groups with increased TAG content compared with the  
271 *AtWR11* control group, in which palmitic acid (C16:0) and C18:3 contents were decreased while  
272 the content of stearic acid (C18:0), oleic acid (C18:1 $\Delta^{cis9}$ , C18:1), and C18:2 were increased  
273 (Figure 6C). The over-expression of a cDNA encoding ACBP-fused CzDGAT1<sub>81-550</sub> also  
274 resulted in a slight increase in TAG production relative to that of the unfused enzyme, although  
275 both groups showed no significant difference in TAG content and composition compared to the  
276 *AtWR11* control group, with an exception of a decrease in C16:0 content in the ACBP-fused  
277 CzDGAT1<sub>81-550</sub> (Figures 6B and C).

278 To test whether ACBP fusion affects the subcellular localization of CzDGAT1, Venus, a  
279 variant of yellow fluorescent protein, was fused to the N-terminal of CzDGAT1<sub>1-550</sub> or ACBP-  
280 CzDGAT1<sub>1-550</sub>, and was transiently co-produced with *A. thaliana* glycerol-3-phosphate  
281 acyltransferase (AtGPAT9) containing a C-terminal SCFP3A (a cyan fluorescent protein) fusion  
282 in tobacco leaves, which is known to reside in the endoplasmic reticulum (ER) (Gidda *et al.*,  
283 2009). Both CzDGAT1<sub>1-550</sub> or ACBP-CzDGAT1<sub>1-550</sub> were found to co-localize with AtGPAT9  
284 (Figure 6D), suggesting their ER localization. It should also be noted that linkage of ACBP to the  
285 N-terminus of CzDGAT1 enhanced the CzDGAT1 production in tobacco leaves as indicated by  
286 the increased fluorescence intensity (Figure 6E) and enhanced protein accumulation levels based  
287 on Western blot analysis (Figures 6F and G).

288

## 289 **DISCUSSION**

290 Recently, DGAT1s from a growing number of microalgal species have been characterized with  
291 the focus on elucidating their physiological role and application in manipulating oil production  
292 (Kirchner *et al.*, 2016; Wei *et al.*, 2017; Guo *et al.*, 2017; Guihéneuf *et al.*, 2011). The structure-  
293 function perspectives of algal DGAT1 and the relationship to plant and animal DGAT1, however,  
294 remain largely unexplored. In the current study, the evolutionary and structural features of algal  
295 DGAT1 in comparison to the higher eukaryotic enzymes were investigated via *in silico* analysis,

296 truncation mutagenesis and *in vitro* enzyme assay, using DGAT1 of the emerging model green  
297 microalga *C. zofingiensis* (Roth *et al.*, 2017; Mao *et al.*, 2019; Liu *et al.*, 2019) as a  
298 representative. Moreover, an improved DGAT1 variant was engineered by N-terminal fusion  
299 with ACBP, and its potential in enhancing oil production was explored using yeast expression  
300 and *N. benthamiana* transient expression systems.

301         The evolutionary and sequence analyses revealed that CzDGAT1 and other green  
302 microalgal DGAT1 are closely related to the plant DGAT1 clade. In addition, algal DGAT1 has  
303 similar structural features to plant and animal DGAT1, such as the highly conserved C-terminal  
304 hydrophobic region forming multiple TMDs and the variable hydrophilic N-terminal region  
305 (Figures 1 and S1 and Table S1). Interestingly, the N-terminus of algal DGAT1 varies  
306 dramatically in length ranging from 20 to 326 amino acid residues, which differs from that of  
307 plant and animal DGAT1 (Figure 1 and Table S1). The large variation in the N-terminal size  
308 appears to be not relevant to the maintenance of enzyme activity, since many DGAT1s with  
309 extremely long or short N-termini have been demonstrated to function in TAG biosynthesis  
310 (Kirchner *et al.*, 2016; Wei *et al.*, 2017; Mao *et al.*, 2019). Furthermore, the N-terminal region of  
311 algal DGAT1 is likely to have different structural features from that of plant and animal DGAT1.  
312 The majority of the N-terminus of plant and animal DGAT1 is disordered, while the small folded  
313 portion contains a conserved allosteric site (Caldo *et al.*, 2017). On the contrary, the algal  
314 DGAT1 N-terminal region has much less propensity to be disordered based on secondary  
315 structure analysis (Figures 2E, F and S2) and the possible allosteric site is less conserved in algal  
316 DGAT1 (Figure 2D). Taken together, these results suggest that the N-terminal region of algal  
317 DGAT1 may have evolved differently from that of plant and animal in terms of structure and  
318 function.

319         The distinct features of the N-terminal domain of algal DGAT1 in enzyme catalysis are  
320 also supported by the evidence from the truncation mutagenesis of CzDGAT1. Previous study on  
321 *B. napus* DGAT1 suggested that the first 80 amino acid residues in the N-terminal region down  
322 regulates enzyme activity and the removal of that region led to higher enzyme activity (Caldo *et*  
323 *al.*, 2017). CzDGAT1 has a N-terminal region (1-107) of a similar size to that of plant and  
324 animal DGAT1 (Table S1), but truncation of the equivalent region to the autoinhibitory motif in  
325 *B. napus* DGAT1 (CzDGAT1<sub>81-550</sub>; Figure 2D) diminished the enzyme activity by 10-fold

326 (Figure 3D), suggesting that this region may not function as an autoinhibitory motif in  
327 CzDGAT1. Indeed, the DISOPRED analysis suggested that the N-terminal domain of CzDGAT1  
328 does not have a strong tendency to have the disordered region where autoinhibitory motifs are  
329 normally found (Figures 2E and F). Moreover, the N-terminal domain was found to be involved  
330 in mediating positive cooperativity in *B. napus* DGAT1, where the N-terminal truncated *B.*  
331 *napus* DGAT1<sub>81-501</sub> had a decreased Hill coefficient value compared to the full-length enzyme  
332 (Caldo *et al.*, 2017). This appears not to be the case for CzDGAT1 since both CzDGAT1 and  
333 CzDGAT1<sub>81-550</sub> exhibited positive cooperativity with close Hill coefficient values (Figures 5A  
334 and B, Table 1). Interestingly, N-terminal truncation of CzDGAT1 (CzDGAT1<sub>81-550</sub>) seems to  
335 alleviate the substrate inhibition of the full-length enzyme (Figure S3 and Table S2), suggesting  
336 that segment 1-80 may be related to a low affinity non-catalytic acyl-CoA binding site.  
337 Furthermore, the N-terminal domains of *B. napus* and mouse DGAT1 were shown to be  
338 responsible for oligomer formation (McFie *et al.*, 2010; Weselake *et al.*, 2006; Caldo *et al.*,  
339 2017). Although whether this domain functions in self-association in CzDGAT1 remains further  
340 exploration, DISOPRED analysis showed that the N-terminus of CzDGAT1 has a less propensity  
341 to form protein-protein interactions than *B. napus* and mouse DGAT1 (Figures 2E, F and S2). In  
342 addition, truncation of this domain did not affect the self-interaction of CzDGAT1 in the  
343 membrane yeast two-hybrid assay (Figure S4). It is also possible that the observed self-  
344 interaction was due to the presence of a region in the hydrophobic part of CzDGAT1 that is  
345 involved in oligomer formation. Indeed, a 16-kDa fragment of mouse DGAT1 present in the ER  
346 lumen was also found to likely form dimer/tetramer (McFie *et al.*, 2010).

347 The removal of the entire N-terminal region in CzDGAT1 (CzDGAT1<sub>107-550</sub>) almost  
348 inactivated the enzyme (Figure 3D), suggesting that the N-terminal region is not necessary for  
349 enzyme catalysis but is important for maintaining high enzyme activity. This agrees with the  
350 previous studies on the *B. napus* DGAT1 (Caldo *et al.*, 2017). Previously, the N-termini of *B.*  
351 *napus* and mouse DGAT1 were found to associate with acyl-CoA in a sigmoidal fashion  
352 (Weselake *et al.*, 2006; Siloto *et al.*, 2008). Replacement of the N-terminal region by ACBP in  
353 CzDGAT1 (ACBP fused CzDGAT1<sub>107-550</sub>), however, was not able to restore or improve the  
354 enzyme activity (Figure 4), suggesting that the N-terminus may function as a regulatory domain  
355 rather than as an acyl-CoA binding site. Indeed, the last 20-30 amino acid residues in the N-  
356 terminus of *B. napus* DGAT1 has a well-folded structure and constitutes a regulatory domain for

357 allosteric binding of acyl-CoA and CoA, where the binding of CoA would trigger the subsequent  
358 inhibition of DGAT activity (Caldo *et al.*, 2017). The allosteric site for CoA, however, is only  
359 partially conserved in CzDGAT1 (Figure 2D), and the activity of CzDGAT1 was not affected in  
360 the presence of 50  $\mu$ M CoA (Figure S5), suggesting that the allosteric site for CoA might be not  
361 present in the algal DGAT1 or not activated under this experimental condition. The CoA  
362 inhibition was also not triggered by fusion with ACBP to CzDGAT1 (Figure S5), despite that  
363 ACBP is able to bind CoA alone (Robinson *et al.*, 1996). However, we cannot rule out the  
364 possibility that failure in restoring DGAT activity by replacing the N-terminus with ACBP may  
365 be caused by the high binding affinity of ACBP to acyl-CoAs, while a moderate binding affinity  
366 being required for the enzyme function. A comprehensive characterization of the N-termini of  
367 CzDGAT1 and other algal DGAT1s with respect to the acyl-CoA binding ability would be an  
368 interesting next step to explore the possible role of this domain in the catalysis of algal DGATs.

369         The two isoforms of DGAT1 from the green microalga *C. zofingiensis* (Mao *et al.*, 2019)  
370 have very distinct features. They share 39.9% amino acid pairwise identity and have very  
371 different lengths mainly attributable to the variable N-terminal regions (Figure S1). The N-  
372 terminus of the CzDGAT1 isoform studied in the current study is of a similar length to that of  
373 plant and animal DGAT1 but with less tendency to be disordered, whereas the other isoform has  
374 an extremely long hydrophilic N-terminus of 289 amino acid residues with the first 160 amino  
375 acid residues showing low tendency to become disordered and the segment consisting of the  
376 remaining 129 residues being highly disordered (Table S1 and Figure S2). Since DGAT1  
377 isoform with a longer N-terminus was found to have a higher ability to restore TAG biosynthesis  
378 in the yeast mutant (Mao *et al.*, 2019), it is possible that their different N-terminal domain  
379 features may directly impact on the enzyme activity and accumulation. Therefore, it would be  
380 interesting to comprehensively compare the structure and function features of the N-terminal  
381 domains of both CzDGAT1 isoforms in the future. Additionally, it may also be worthwhile to  
382 explore the activities and physiological functions of CzDGAT1 in detail, especially considering  
383 that the coding genes of both isoforms were up-regulated under nitrogen deprivation and high-  
384 light stress conditions to contribute to TAG accumulation but with very different transcript  
385 abundances (under both conditions) and response patterns (under high-light stress) (Roth *et al.*,  
386 2017; Mao *et al.*, 2019; Liu *et al.*, 2019).



387 It is interesting to note that N-terminal fusion with ACBP could markedly increase the  
388 yeast recombinant protein production up to 28 folds (Figure 4A). It has been suggested that the  
389 identity of the amino acid residues at the N-terminus of proteins could potentially affect the  
390 protein turnover and/or translation rate and thus enhance the protein production (Greer *et al.*,  
391 2015; Sriram *et al.*, 2011). Indeed, the addition of N-terminal tag was found to increase the  
392 production of *B. napus* DGAT1 and plant fatty acid desaturases in yeast cells (O'Quin *et al.*,  
393 2009; Greer *et al.*, 2015). Previously, fusion with small soluble proteins, such as thioredoxin,  
394 ubiquitin and maltose binding protein was also found to augment the accumulation levels of  
395 recombinant protein in *Escherichia coli* and/or yeast likely by improving protein stability and/or  
396 translation efficiency (Marsh *et al.*, 1989; Pryor and Leiting, 1997; Jacquet *et al.*, 1999; Ecker *et*  
397 *al.*, 1989). The protein fusion strategy, especially fusion to ubiquitin, has also met considerable  
398 success in increasing protein production in transgenic plants (Mishra *et al.*, 2006; Tian and Sun,  
399 2011; Hondred *et al.*, 1999; Streatfield, 2007). Our finding that linkage to ACBP enhanced the  
400 CzDGAT1 production in tobacco leaves (Figures 6E-G) suggests that ACBP might also have  
401 potential to be used as a protein fusion partner to enhance protein accumulation in plants,  
402 especially for membrane-bound acyl-CoA-dependent enzymes.

403 Fusion with ACBP not only augmented the production of CzDGAT1 (Figures 4A and  
404 6E-G) but also improved the kinetic parameters of the enzyme (Figure 5). Our kinetic analysis  
405 showed that ACBP-fused CzDGAT1<sub>1-550</sub> or ACBP-fused CzDGAT1<sub>81-550</sub> still exhibited positive  
406 cooperativity despite that ACBP binds acyl-CoA in a typical hyperbolic manner (Brown *et al.*,  
407 1998; Yurchenko *et al.*, 2009) and, more importantly, the fused enzymes had increased affinity  
408 for oleoyl-CoA with the apparent  $S_{0.5}$  values decreasing by 1.6 and 1.2-fold, respectively (Table  
409 1 and Figure 5). DGAT affinity for oleoyl-CoA has been reported as an important determinant of  
410 oil production since a strong correlation of oleoyl-CoA affinity with oil content was found in  
411 soybean expressing *DGAT1* variants (Roesler *et al.*, 2016). Cytosolic 10-kDa ACBP, consisting  
412 of four  $\alpha$  helices (Figure S6), is capable of binding acyl-CoAs with high affinity (Robinson *et al.*,  
413 1996; Du *et al.*, 2016). Considering the increased DGAT affinity for oleoyl-CoA of the ACBP-  
414 fused CzDGAT1, we proposed that ACBP would facilitate the feeding of acyl-CoA to the  
415 catalytic pocket of CzDGAT1 via capturing cytosolic acyl-CoAs (or those partitioned into the  
416 membrane lipid bilayer) and subsequent channeling to DGAT by proximity (Figure S6).  
417 Similarly, fusion of proteins in a consecutive reaction has been shown to have synergistic effects



418 in substrate conversion in a single catalytic region (Elleuche, 2015). ACBP has been implicated  
419 in acyl-CoA binding and transport, which maintains the substrate supply for the acyl-CoA-  
420 dependent acyltransferases in the ER, including DGAT (Yurchenko and Weselake, 2011).  
421 Recently, ACBP2 was found to probably interact directly with lysophospholipase 2 in *A.*  
422 *thaliana* and thereby facilitate the lysophosphatidylcholine hydrolysis (Miao *et al.*, 2019).  
423 Therefore, it is plausible to assume the presence of transient interactions between ACBP and  
424 DGAT, the enhancement of which via protein fusion may further lead to an efficient substrate  
425 channeling. Furthermore, *B. napus* ACBP has been shown to slightly stimulate DGAT1 activity  
426 when the concentration of acyl-CoA is higher than that of ACBP, but to inhibit DGAT activity  
427 when ACBP is in excess likely due to the competition of ACBP with ACBP-bound acyl-CoA or  
428 DGAT for enzyme-substrate interaction (Yurchenko and Weselake, 2011). ACBP-fused  
429 CzDGAT1 or CzDGAT1<sub>81-550</sub>, on the other hand, showed a more rapid response to increasing  
430 acyl-CoA concentration from 0.1 to 5 or 10  $\mu\text{M}$  than the unfused enzymes, respectively (Figure 5  
431 and Table 1), suggesting that in the 1:1 fusion form ACBP may facilitate enzyme-substrate  
432 binding rather than compete with DGAT for substrate.

433 The kinetically improved DGAT1 via fusion with ACBP shows promises in oil  
434 production in both yeast and plant systems (Figure 6). Although ACBP-fused DGAT1 was able  
435 to augment the yeast neutral lipid production up to two-fold relative to that of the unfused  
436 enzyme, a comparable level was also achieved in the yeast co-expressing individual fusion  
437 groups (Figure 6A). In tobacco transient expression system, ACBP-fused DGAT1 was more  
438 efficient to boost leaf TAG content than the unfused enzyme and the co-expressed group. It  
439 should be noted that the sizes of the acyl-CoA pool in yeast and tobacco leaf cells are different.  
440 The cellular concentration of total acyl-CoA pool in *S. cerevisiae* has been reported to be in the  
441 range of 10-42  $\mu\text{M}$  depending on the strain and its metabolic state (Schjerling *et al.*, 1996;  
442 Mandrup *et al.*, 1993; Knudsen *et al.*, 1994); whereas the concentration of total acyl-CoAs in  
443 tobacco leaves was determined to be 0.5  $\mu\text{M}$  (Moreno *et al.*, 2014) [intracellular concentrations  
444 were converted to  $\mu\text{M}$  assuming a specific cell volume of  $3.7 \times 10^{-14}$  L/cell (Krink-Koutsoubelis  
445 *et al.*, 2018) and 1 mg equal to 1  $\mu\text{L}$  volume (Larson and Graham, 2001), for yeast and plant cells,  
446 respectively]. Co-production of ACBP and DGAT1 appears to work better in the cells with the  
447 acyl-CoA concentration at higher levels rather than lower levels (Figures 6A and B). It is  
448 possible that co-production of ACBP with DGAT1 affected *in vivo* DGAT1 activity in a manner

449 dependent on the cellular acyl-CoA concentration, where co-produced ACBP stimulates DGAT1  
450 activity at high acyl-CoA concentration but restricts DGAT1 activity at low acyl-CoA  
451 concentration, which agrees with the previous finding on the *in vitro* stimulation of DGAT  
452 activity by *B. napus* ACBP (Yurchenko and Weselake, 2011). ACBP-fused DGAT1, on the other  
453 hand, showed good performance in cells with both low and high concentrations of acyl-CoAs  
454 (Figures 6A and B) likely due to the improved enzyme kinetics and protein production levels,  
455 despite that fusion with ACBP slightly enhanced the substrate inhibition of DGAT1 at the acyl-  
456 CoA concentrations above 10  $\mu$ M (Figure S3 and Table S2). Moreover, it would be interesting to  
457 explore the potential of co-producing DGAT with other ACBP isoforms, such as ER-bound  
458 ACBP, in improving TAG production, since both soluble and ER-bound ACBP may be involved  
459 in the capture and shuttle of acyl-CoAs for downstream acyl-CoA-dependent acyltransferases.

460 In conclusion, our results suggested that algal DGAT1 may have different evolutionary  
461 and structural features from plant and animal DGAT1 with respect to the hydrophilic N-terminal  
462 domain. This domain is predicted to be present in a less disordered state in CzDGAT1 than that  
463 of animal/plant DGAT1. Although the N-terminal domain is not necessary for acyltransferase  
464 activity of CzDGAT1, its removal, however, led to huge decreases in CzDGAT1 enzyme activity,  
465 which cannot be restored by fusion with an ACBP. We also found that fusion of ACBP to the N-  
466 terminus of the full-length CzDGAT1 could not only augment the protein accumulation levels in  
467 yeast and tobacco leaves but also kinetically improve the enzyme. ACBP-fused DGAT1 was  
468 more effective in improving the oil contents of yeast cells and vegetative tissues than the native  
469 DGAT1. This strategy may have great potential in engineering membrane-bound acyl-CoA-  
470 dependent enzymes and manipulating oil biosynthesis in plants, algae and other oleaginous  
471 organisms.

472

## 473 **EXPERIMENTAL PROCEDURES**

### 474 **Sequence analysis**

475 Multiple sequence alignments of DGAT1 proteins from different animal, plant and microalgal  
476 species (Table S1) were performed using the L-INS-i method implemented in MAFFT v7.271  
477 (Kato and Standley, 2013) and trimmed using trimAl v1.2 (Capella-Gutiérrez *et al.*, 2009). The

478 resulting alignments were used for model selection using IQ-TREE (v1.3.11.1) with the option “-  
479 m TESTONLY”. The phylogenetic tree was then constructed with the best-fit model for protein  
480 alignment (LG+F+I+G) using Phyml v3.0 (Guindon *et al.*, 2010) and visualized with iTOL v3  
481 (Letunic and Bork, 2016). The topology organization of DGAT1 was predicted using TMHMM  
482 (Krogh *et al.*, 2001).

483

#### 484 **Construct preparation, yeast transformation and heterologous expression of *DGAT1*** 485 **variants**

486 The coding sequence of *CzDGAT1* (Phytozome accession number: Cz09g08290) was chemically  
487 synthesized (General Biosystems, Morrisville, NC), and re-cloned into the pYES2.1 yeast  
488 expression vector (Invitrogen, Burlington, Canada) under the control of the galactose-inducible  
489 *GALI* promoter. N-terminal truncation mutants of *CzDGAT1* were PCR-amplified and subcloned  
490 into the pYES2.1 vector. The coding sequence of *AtACBP6* (NCBI accession number:  
491 NM\_102916) was PCR-amplified from the plasmid pAT332 (kindly provided by Dr. Mee-Len  
492 Chye, University of Hong Kong) (Chen *et al.*, 2008), and subcloned into the pYES2.1 vector and  
493 the pESC-leu2d(empty) vector (a gift from Dr. Jay Keasling; Addgene plasmid # 20120) (Ro *et*  
494 *al.*, 2006). To generate ACBP-CzDGAT1<sub>1-550</sub>, ACBP-CzDGAT1<sub>81-550</sub> and ACBP-CzDGAT1<sub>107-</sub>  
495 <sub>550</sub> fusion proteins, the coding sequences of *AtACBP6* and variant *CzDGAT1s* were individually  
496 amplified and the resulting amplicons were fused using overlap extension PCR. The DNA  
497 sequences of ACBP-CzDGAT1<sub>1-550</sub>, ACBP-CzDGAT1<sub>81-550</sub> and ACBP-CzDGAT1<sub>107-550</sub> fusion  
498 proteins were then subcloned into the pYES2.1 vector. The stop codon was removed from each  
499 sequence for in-frame fusion with a C-terminal V5 tag, which is encoded in the pYES2.1 vector.  
500 The primers used for the preparation of all the constructs are listed in Table S3.

501 After the integrity of each construct was confirmed by sequencing, the constructs were  
502 transformed into the quadruple mutant strain *S. cerevisiae* H1246 (*MAT $\alpha$  are1- $\Delta$ ::HIS3, are2-*  
503  *$\Delta$ ::LEU2, dgal- $\Delta$ ::KanMX4, lro1- $\Delta$ ::TRP1 ADE2*) using an *S.c.* EasyComp Transformation Kit  
504 (Invitrogen) for yeast heterologous expression (Xu, Holic, *et al.*, 2018; Xu *et al.*, 2017; Xu *et al.*,  
505 2019). The recombinant yeast cells were first cultured overnight in liquid minimal medium  
506 containing 0.67% (w/v) yeast nitrogen base, 0.2% (w/v) synthetic complete medium lacking  
507 uracil (SC-Ura) and 2% (w/v) raffinose. The yeast cultures were then used to inoculate the

508 induction medium containing 0.67% (w/v) yeast nitrogen base, 0.2% (w/v) SC-Ura, 2% (w/v)  
509 galactose, and 1% (w/v) raffinose at an initial optical density of 0.4 at 600 nm (OD<sub>600</sub>). For co-  
510 expression of *AtACBP6* and *CzDGAT1*, SC-Ura in the liquid minimal medium was replaced by  
511 synthetic complete medium lacking leucine and uracil. For the fatty acid feeding experiment,  
512 yeast cells were cultured in the induction medium with the supplementation of 200 mM of C18:2  
513 or C18:3 fatty acid. Yeast cultures were grown at 30°C with shaking at 220 rpm.

514

### 515 **Preparation of yeast microsomal fractions**

516 Microsomal fractions containing recombinant *CzDGAT1* variants were isolated from yeast cells  
517 as described previously (Xu *et al.*, 2017; Xu *et al.*, 2019; Xu, Holic, *et al.*, 2018). In brief, the  
518 recombinant yeast cells were collected at the mid log growth stage with an OD<sub>600</sub> value around  
519 6.5, washed, and then resuspended in 1 mL of lysis buffer [20 mM Tris-HCl pH 7.9, containing  
520 10 mM MgCl<sub>2</sub>, 1 mM EDTA, 5% (v/v) glycerol, 300 mM ammonium sulfate and 2 mM  
521 dithiothreitol]. The cells were homogenized by a bead beater (Biospec, Bartlesville, OK, USA)  
522 in the presence of 0.5 mm glass beads and then centrifuged at 10 000 g at 4°C for 30 min to  
523 remove cell debris and glass beads. The recovered supernatant was further centrifuged at 105  
524 000 g at 4°C for 70 min to pellet the microsomes. The resulting microsomal fractions were  
525 resuspended in ice-cold suspension buffer (3 mM imidazole buffer, pH 7.4, and 125 mM  
526 sucrose). Protein concentration was quantified by the Bradford assay (Bio-Rad, Mississauga,  
527 Canada) using BSA as a standard (Bradford, 1976).

528

### 529 ***In vitro* DGAT1 assay**

530 *In vitro* DGAT assay was performed according to the procedure described previously (Xu *et al.*,  
531 2017; Xu *et al.*, 2019; Xu, Holic, *et al.*, 2018). Briefly, a 60- $\mu$ L reaction mixture containing 200  
532 mM HEPES-NaOH (pH 7.4), 3.2 mM MgCl<sub>2</sub>, 333  $\mu$ M *sn*-1,2-diolein [dispersed in 0.2% (v/v)  
533 Tween 20], 15  $\mu$ M [<sup>14</sup>C] oleoyl-CoA (56  $\mu$ Ci/ $\mu$ mol; American Radiolabeled Chemicals, St.  
534 Louis, MO, USA), and 10-50  $\mu$ g of microsomal protein was incubated at 30°C for 4-30 min with  
535 shaking. The reaction was initiated by adding microsomes containing recombinant *CzDGAT1*  
536 variants and terminated by adding 10  $\mu$ L of 10% (w/v) SDS. The entire reaction mixture was

537 then loaded onto a thin-layer chromatography (TLC) plate (0.25 mm Silica gel, DC-Fertigplatten,  
538 Macherey-Nagel, Germany). The plate was developed with hexane/diethyl ether/acetic acid  
539 (80:20:1, v/v/v) and the resolved lipids were visualized by phosphorimaging (Typhoon Trio  
540 Variable Mode Imager, GE Healthcare, Mississauga, Canada). The corresponding TAG spots  
541 were scraped and quantified for radioactivity using a LS 6500 multi-purpose scintillation counter  
542 (Beckman-Coulter, Mississauga, Canada).

543 For kinetic assay, the concentration of [ $1-^{14}\text{C}$ ] oleoyl-CoA was varied from 0.1 to 25  $\mu\text{M}$   
544 while *sn*-1,2-diolein was held constant at 333  $\mu\text{M}$ . The DGAT assay reaction time and the  
545 quantity of microsomal protein used were as follows: for CzDGAT<sub>1-550</sub> and ACBP-CzDGAT<sub>1-</sub>  
546 <sub>550</sub>, 10  $\mu\text{g}$  of microsomal protein for 4 min; for ACBP-CzDGAT<sub>181-550</sub>, 5  $\mu\text{g}$  of microsomal  
547 protein for 30 min; for CzDGAT<sub>181-550</sub>, 10  $\mu\text{g}$  of microsomal protein for 30 min. Enzyme kinetic  
548 parameters were calculated by fitting the data to the Michaelis-Menten equation, allosteric  
549 sigmoidal equation, or a previously proposed model accounting for sigmoidicity and substrate  
550 inhibition (Xu *et al.*, 2017) using the program GraphPad Prism (version 6.0; GraphPad Software,  
551 La Jolla, CA, USA).

552

### 553 **Transient expression of CzDGAT1 variants in *N. benthamiana* leaves**

554 *N. benthamiana* plants were grown in a growth chamber at 25°C, 50% humidity and 16/8 hr  
555 day/night cycle. For transient expression in *N. benthamiana* leaves for lipid production, cDNAs  
556 encoding *AtWR11* (previously isolated using *A. thaliana* cDNA in our lab), CzDGAT<sub>1-550</sub>, the  
557 N-terminal truncation mutant (CzDGAT<sub>181-550</sub>) and their ACBP-fused versions (ACBP-  
558 CzDGAT<sub>1-550</sub> and ACBP-CzDGAT<sub>181-550</sub>) were subcloned in a pGREEN 0229 vector under a  
559 *cauliflower mosaic virus (CaMV) 35S* promoter, respectively. For the examination of the  
560 subcellular localization, cDNAs encoding CzDGAT<sub>1-550</sub> and ACBP-CzDGAT<sub>1-550</sub> were fused  
561 in frame to the downstream of *Venus*, which was amplified from the pSYFP2-SCFP3A plasmid  
562 (a gift from Dr. Dorus Gadella; Addgene plasmid # 22905) (Kremers *et al.*, 2006), and was  
563 inserted downstream of a *CaMV 35S* promoter in the modified pGPTVII vector (kindly provided  
564 by Dr. Jörg Kudla, University of Münster) (Becker *et al.*, 1992; Gehl *et al.*, 2009). The coding  
565 sequence of *AtGPAT9* (Singer *et al.*, 2016) was fused in frame to the upstream of *SCFP3A*

566 (amplified from the pSYFP2-SCFP3A plasmid), subcloned in the modified pGPTVII vector  
567 under a *CaMV 35S* promoter and used as an ER marker (Gidda *et al.*, 2009).

568 All constructs were individually transformed to *Agrobacterium tumefaciens* GV3101  
569 cells via electroporation. Each pGREEN construct was transformed along with the pSOUP  
570 helper plasmid. *A. tumefaciens* cultures containing the *p19* vector encoding a viral suppressor  
571 protein and each variant *CzDGAT1* were mixed in a transformation medium [50 mM MES, 2  
572 mM Na<sub>3</sub>PO<sub>4</sub>, 0.5% (w/v) glucose and 0.1 mM acetosyringone] with the final OD<sub>600</sub> of each  
573 culture equal to 0.125 (or 0.25 for subcellular localization experiments) prior to infiltration into  
574 *N. benthamiana* leaves as described by Vanhercke *et al.* (2013). For lipid analysis, *N.*  
575 *benthamiana* plants were grown for a further five days before leaf samples were collected, flash  
576 frozen, freeze-dried, and stored at -80°C. For protein extraction, *N. benthamiana* leaves were  
577 harvested after 2 days of infiltration and were ground in liquid nitrogen to a fine powder using  
578 mortar and pestle. The resulting leaf powders were then mixed with 1 volume (v/w) of ice-cold  
579 extraction buffer (4 M urea, 100 mM DTT, 1% Triton X-100, and 1 mM PMSF), and incubated  
580 on ice for 10 min. The homogenate was clarified by centrifugation at 12 000 g for 5 min at 4°C  
581 and the supernatant was used for SDS-PAGE gel analysis immediately after preparation.

582 For subcellular localization experiments, *AtGPAT9-SCFP3C* was co-infiltrated with the  
583 *p19* vector and *Venus-CzDGAT1* or *Venus-ACBP-CzDGAT1* and the fluorescence of the lower  
584 epidermis of leaves after 2-3 days of infiltration was visualized using a fluorescent microscope  
585 (Axio Imager M1m microscope; Carl Zeiss Inc., Germany). The excitation wavelengths for  
586 Venus and SCFP3A were 546/12 and 365 nm, respectively, and the emission filter wavelengths  
587 were 575–640 nm for Venus and 455/50 nm for SCFP3A. For the quantification of fluorescence  
588 intensity, the fluorescent proteins were extracted from tobacco leaves transiently expressing the  
589 *p19* vector and *Venus-CzDGAT1* or *Venus-ACBP-CzDGAT1* by grinding on ice with a two-fold  
590 volume of pre-chilled extraction buffer containing 100 mM MOPS (pH 7.2), 5 mM MgCl<sub>2</sub>,  
591 0.02% BSA and 1% protease inhibitor, followed by centrifugation. One hundred microliters of  
592 the supernatant were then placed into 96-well solid black plates (Corning Inc., Corning, NY,  
593 USA) and the fluorescence intensity of Venus-tagged protein was measured on a Synergy H4  
594 Hybrid reader (Biotek, Winooskit, VT, USA) at excitation and emission wavelengths of 485 nm  
595 and 528 nm, respectively.



## 596 **Western blotting**

597 Equivalent amounts of yeast microsomal proteins (15  $\mu\text{g}$ ) or protein extracts from leaf samples  
598 containing recombinant CzdGAT1 variants were incubated with 5 $\times$  SDS loading buffer at room  
599 temperature for 15 min, resolved through SDS-PAGE Gels (Bio-Rad) and electrotransferred (2 h  
600 at 80 V or 16 h at 30 V and 4°C) onto polyvinylidene difluoride membrane (Amersham, GE  
601 Healthcare). The recombinant enzymes were probed using anti-V5-HRP conjugated antibody  
602 (Invitrogen), which was detected using an ECL Advance Western Blotting Detection Kit  
603 (Amersham) by a FluorChem SP imager (Alpha Innotech Corp., San Leandro, CA, U.S.A.). The  
604 band densities were semi-quantified with ImageJ software (Schneider *et al.*, 2012).

605

## 606 **Lipid analysis**

607 The yeast neutral lipid content was analyzed by the Nile red fluorescence assay as described  
608 previously (Xu *et al.*, 2017). In brief, an aliquot (100  $\mu\text{L}$ ) of yeast culture was incubated with 5  
609  $\mu\text{L}$  of Nile red solution (0.1 mg/mL in methanol) into 96-well solid black plates (Corning Inc.).  
610 The fluorescence was measured before and after the addition of the Nile red solution with  
611 excitation and emission at 485 and 538 nm, respectively, using a Synergy H4 Hybrid reader  
612 (Biotek). The neutral lipid content in yeast was represented by the Nile red values which were  
613 calculated based on the change in fluorescence over OD<sub>600</sub> ( $\Delta\text{F}/\text{OD}_{600}$ ).

614 The TAG content and fatty acid composition of yeast cells and *N. benthamiana* leaf  
615 samples were analyzed using GC/MS. Yeast total lipids were extracted from approximately 30  
616 mg of lyophilized yeast cells as described previously (Xu *et al.*, 2019; Xu, Holic, *et al.*, 2018).  
617 As for *N. benthamiana* leaf samples, 70 mg lyophilized leaf tissues were homogenized in  
618 chloroform: isopropanol (2:1, v/v) for total lipids extraction as described previously  
619 (Mietkiewska *et al.*, 2014). For quantification, 100  $\mu\text{g}$  of triheptadecanoin (C17:0 TAG) were  
620 added to each sample as an internal standard. The extracted lipids were further separated on a  
621 TLC plate (0.25 mm Silica gel, DC-Fertigplatten) as described above and the lipid bands were  
622 visualized by spraying with primulin solution [0.05% primulin (w/v) in acetone/water (80:20,  
623 v/v)]. The corresponding TAG bands were then scraped and trans-methylated by incubating with  
624 1 mL of 3 N methanolic HCl at 80 °C for 1 h. The resulting fatty acid methyl esters were  
625 analyzed using GC/MS (Agilent Technologies, Wilmington, DE) equipped with a capillary DB-



626 23 column (30 m × 0.25 mm × 0.25 µm) as described previously (Xu *et al.*, 2019; Xu, Holic, *et*  
627 *al.*, 2018).

628

### 629 **Statistical analysis**

630 Data are shown as means ± standard derivation (S.D.) for the number of independent  
631 experiments indicated. Significant differences between two groups were assessed using a  
632 Student's t-test with the SPSS statistical package (SPSS 16.0, Chicago, IL, USA). The equality  
633 of variance was tested by Levene's test. The unpaired Student's t-test assuming equal variances  
634 and the unpaired Student's t-test with Welch corrections assuming unequal variances were  
635 performed when the variances were equal and unequal, respectively.

636

### 637 **ACCESSION NUMBERS**

638 Sequence data from this article can be accessed in the Phytozome/GenBank/Arabidopsis  
639 Genome Initiative databases under the following accession numbers: AtACBP6, NM\_102916;  
640 AtGPAT9, AT5G60620; AtWRI1, AY254038; CzDGAT1, Cz09g08290.

641

### 642 **ACKNOWLEDGEMENTS**

643 We acknowledge the support provided by the University of Alberta Start-up Research Grant,  
644 Natural Sciences and Engineering Research Council of Canada Discovery Grant (RGPIN-2016-  
645 05926) and the Canada Research Chairs Program. We are grateful to Dr. Mee-Len Chye  
646 (University of Hong Kong) for providing the plasmid pAT332 containing the coding sequence of  
647 *AtACBP6* and Dr. Igor Stagljjar (University of Toronto) for providing the membrane yeast two-  
648 hybrid system. We also thank Dr. Stacy Singer (Agriculture and Agri-Food Canada) for sharing  
649 her experience on tobacco leaf infiltration, Dr. Michael Gänzle, Dr. Yuan Fang and Mr. Kosala  
650 Waduthanthri (University of Alberta) for their assistance in fluorescence microscopy and Dr.  
651 Shanjida Khan (University of Alberta) for providing the *N. benthamiana* seeds.

652

653

654 **AUTHOR CONTRIBUTIONS**

655 GC supervised the experiment; YX, GC, and KMPC designed the experiment; YX performed the  
656 experiments and prepared the initial draft of the manuscript. YX, KMPC and LF analyzed the  
657 data. KMPC and KJ contributed valuable discussion during this study. All authors were involved  
658 in further editing of the manuscript.

659

660

661 **CONFLICT OF INTEREST**

662 The authors declare that they have no conflicts of interest with the content of this article.

663

664 **SUPPORTING INFORMATION**

665 **Method S1.** Membrane yeast two-hybrid assay.

666 **Table S1.** DGAT1 proteins used for multiple sequence alignment.

667 **Table S2.** Apparent kinetic parameters of CzDGAT1 variants using a combined model  
668 accounting for sigmoidicity and substrate inhibition (Xu et al., 2017).

669 **Table S3.** Primers used in the current study.

670 **Figure S1.** Alignment of DGAT1 from different species.

671 **Figure S2.** Prediction of intrinsic disorder profile (blue) of the N-terminal region of DGAT1  
672 from representative algae, plant and animals and its likelihood to participate in protein-protein  
673 interaction (red).

674 **Figure S3.** DGAT activity of CzDGAT1 variant enzymes at high oleoyl-CoA concentrations.

675 **Figure S4.** Probing possible self-interaction of CzDGAT1 variants using membrane yeast two-  
676 hybrid assay.

677 **Figure S5.** Enzyme activity of CzDGAT1 variants in the presence of Coenzyme A (CoA).

678 **Figure S6.** Illustration of the N-terminal fusion of acyl-CoA binding protein (ACBP) to  
679 CzDGAT1.

680

681 **REFERENCES:**

- 682 **Alameldin, H., Izadi-Darbandi, A., Smith, S.A. and Balan, V.** (2017) Metabolic engineering  
683 to increase the corn seed storage lipid quantity and change its compositional quality. *Crop*  
684 *Sci*, **57**, 1854–1864.
- 685 **Becker, D., Kemper, E., Schell, J. and Masterson, R.** (1992) New plant binary vectors with  
686 selectable markers located proximal to the left T-DNA border. *Plant Mol. Biol.*, **20**, 1195–  
687 1197.
- 688 **Bouvier-Navé, P., Benveniste, P., Oelkers, P., Sturley, S.L. and Schaller, H.** (2000)  
689 Expression in yeast and tobacco of plant cDNAs encoding acyl CoA:diacylglycerol  
690 acyltransferase. *FEBS J.*, **267**, 85–96.
- 691 **Bradford, M.M.** (1976) A rapid and sensitive method for the quantitation of microgram  
692 quantities of protein utilizing the principle of protein-dye binding. *Anal. Biochem.*, **72**, 248–  
693 254.
- 694 **Brown, A.P., Johnson, P., Rawsthorne, S. and Hills, M.J.** (1998) Expression and properties of  
695 acyl-CoA binding protein from *Brassica napus*. *Plant Physiol. Biochem.*, **36**, 629–635.
- 696 **Caldo, K.M.P., Acedo, J.Z., Panigrahi, R., et al.** (2017) Diacylglycerol acyltransferase 1 is  
697 regulated by its N-terminal domain in response to allosteric effectors. *Plant Physiol*, **175**,  
698 667–680.
- 699 **Capella-Gutiérrez, S., Silla-Martínez, J.M. and Gabaldón, T.** (2009) trimAl: A tool for  
700 automated alignment trimming in large-scale phylogenetic analyses. *Bioinformatics*, **25**,  
701 1972–1973.
- 702 **Chen, G., Xu, Y., Siloto, R.M.P., et al.** (2017) High-performance variants of plant  
703 diacylglycerol acyltransferase 1 generated by directed evolution provide insights into  
704 structure function. *Plant J*, **92**, 167–177.
- 705 **Chen, J.E. and Smith, A.G.** (2012) A look at diacylglycerol acyltransferases (DGATs) in algae.  
706 *J. Biotechnol.*, **162**, 28–39.
- 707 **Chen, Q.-F., Xiao, S. and Chye, M.-L.** (2008) Overexpression of the Arabidopsis 10-kilodalton  
708 acyl-Coenzyme A-binding protein ACBP6 enhances freezing tolerance. *Plant Physiol.*, **148**,

- 709 304–315.
- 710 **Du, Z.Y., Arias, T., Meng, W. and Chye, M.L.** (2016) Plant acyl-CoA-binding proteins: An  
711 emerging family involved in plant development and stress responses. *Prog. Lipid Res.*, **63**,  
712 165–181.
- 713 **Ecker, D.J., Stadel, J.M., Butt, T.R., et al.** (1989) Increasing gene expression in yeast by  
714 fusion to ubiquitin. *J. Biol. Chem.*, **264**, 7715–7719.
- 715 **Elleuche, S.** (2015) Bringing functions together with fusion enzymes—from nature’s inventions  
716 to biotechnological applications. *Appl. Microbiol. Biotechnol.*, **99**, 1545–1556.
- 717 **Gehl, C., Waadt, R., Kudla, J., Mendel, R.R. and Hänsch, R.** (2009) New GATEWAY  
718 vectors for high throughput analyses of protein-protein interactions by bimolecular  
719 fluorescence complementation. *Mol. Plant*, **2**, 1051–1058.
- 720 **Gidda, S.K., Shockey, J.M., Rothstein, S.J., Dyer, J.M. and Mullen, R.T.** (2009) *Arabidopsis*  
721 *thaliana* GPAT8 and GPAT9 are localized to the ER and possess distinct ER retrieval  
722 signals: Functional divergence of the dilysine ER retrieval motif in plant cells. *Plant Physiol.*  
723 *Biochem.*, **47**, 867–879.
- 724 **Gong, Y., Zhang, J., Guo, X., Wan, X., Liang, Z., Hu, C.J. and Jiang, M.** (2013)  
725 Identification and characterization of PtDGAT2B, an acyltransferase of the DGAT2 acyl-  
726 Coenzyme A: Diacylglycerol acyltransferase family in the diatom *Phaeodactylum*  
727 *tricornutum*. *FEBS Lett.*, **587**, 481–487.
- 728 **Greer, M.S., Truksa, M., Deng, W., Lung, S.C., Chen, G. and Weselake, R.J.** (2015)  
729 Engineering increased triacylglycerol accumulation in *Saccharomyces cerevisiae* using a  
730 modified type 1 plant diacylglycerol acyltransferase. *Appl. Microbiol. Biotechnol.*, **99**,  
731 2243–2253.
- 732 **Guihéneuf, F., Leu, S., Zarka, A., et al.** (2011) Cloning and molecular characterization of a  
733 novel acyl-CoA:diacylglycerol acyltransferase 1-like gene (PtDGAT1) from the diatom  
734 *Phaeodactylum tricornutum*. *FEBS J.*, **278**, 3651–3666.
- 735 **Guindon, S., Dufayard, J.-F.F., Lefort, V., Anisimova, M., Hordijk, W. and Gascuel, O.**  
736 (2010) New algorithms and methods to estimate maximum-likelihood phylogenies:  
737 Assessing the performance of PhyML 2.0. *Syst. Biol.*, **59**, 307–321.

- 738 **Guo, X., Fan, C., Chen, Y., Wang, J., Yin, W., Wang, R.R.C. and Hu, Z.** (2017)  
739 Identification and characterization of an efficient *acyl-CoA: diacylglycerol acyltransferase*  
740 *1 (DGAT1)* gene from the microalga *Chlorella ellipsoidea*. *BMC Plant Biol.*, **17**, 48.
- 741 **Hondred, D., Walker, J.M., Mathews, D.E. and Vierstra, R.D.** (1999) Use of ubiquitin  
742 fusions to augment protein expression in transgenic plants. *Plant Physiol.*, **119**, 713–723.
- 743 **Hu, Q., Sommerfeld, M., Jarvis, E., Ghirardi, M., Posewitz, M., Seibert, M. and Darzins, A.**  
744 (2008) Microalgal triacylglycerols as feedstocks for biofuel production: perspectives and  
745 advances. *Plant J.*, **54**, 621–639.
- 746 **Iwai, M., Ikeda, K., Shimojima, M. and Ohta, H.** (2014) Enhancement of extraplastidic oil  
747 synthesis in *Chlamydomonas reinhardtii* using a type-2 diacylglycerol acyltransferase with  
748 a phosphorus starvation–inducible promoter. *Plant Biotechnol. J.*, **12**, 808–819.
- 749 **Jacquet, A., Daminet, V., Haumont, M., Garcia, L., Chaudoir, S., Bollen, A. and Biemans,**  
750 **R.** (1999) Expression of a recombinant *Toxoplasma gondii* ROP2 fragment as a fusion  
751 protein in bacteria circumvents insolubility and proteolytic degradation. *Protein Expr. Purif.*,  
752 **17**, 392–400.
- 753 **Jako, C., Kumar, A., Wei, Y., Zou, J., Barton, D.L., al., et, Giblin, E.M., Covello, P.S. and**  
754 **Taylor, D.C.** (2001) Seed-specific over-expression of an Arabidopsis cDNA encoding a  
755 diacylglycerol acyltransferase enhances seed oil content and seed weight. *Plant Physiol.*,  
756 **126**, 861–874.
- 757 **Katavic, V., Reed, D.W., Taylor, D.C., Ciblin, E.M., Barton, D.L., Zou, J., Mackenzie, S.L.,**  
758 **Covello, P.S. and Kunst, L.** (1995) Alteration of seed fatty acid composition by an ethyl  
759 methanesulfonate-induced mutation in *Arabidopsis thaliana* affecting diacylglycerol  
760 acyltransferase activity. *Plant Physiol.*, **108**, 399–409.
- 761 **Katoh, K. and Standley, D.M.** (2013) MAFFT multiple sequence alignment software version 7:  
762 Improvements in performance and usability. *Mol. Biol. Evol.*, **30**, 772–780.
- 763 **Kim, H., Park, J.H., Kim, A.Y., Suh, M.C., Kim, D.J., Kim, Y.A. and Suh, M.C.** (2016)  
764 Functional analysis of *diacylglycerol acyltransferase1* genes from *Camelina sativa* and  
765 effects of *CsDGAT1B* overexpression on seed mass and storage oil content in *C. sativa*.  
766 *Plant Biotechnol. Rep.*, **10**, 141–153.

- 767 **Kirchner, L., Wirshing, A., Kurt, L., Reinard, T., Glick, J., Cram, E.J., Jacobsen, H.-J. and**  
768 **Lee-Parsons, C.W.T.** (2016) Identification, characterization, and expression of  
769 diacylglycerol acyltransferase type-1 from *Chlorella vulgaris*. *Algal Res.*, **13**, 167–181.
- 770 **Knudsen, J., Faergeman, N.J., Skøtt, H., et al.** (1994) Yeast acyl-CoA-binding protein: acyl-  
771 CoA-binding affinity and effect on intracellular acyl-CoA pool size. *Biochem. J.*, **302**, 479–  
772 485.
- 773 **Kong, F., Romero, I.T., Warakanont, J. and Li-Beisson, Y.** (2018) Lipid catabolism in  
774 microalgae. *New Phytol.*, **218**, 1340–1348.
- 775 **Kremers, G., Goedhart, J., Munster, E.B. Van and Gadella, T.W.J.** (2006) Cyan and yellow  
776 super fluorescent proteins with improved brightness, protein folding, and FRET Förster  
777 radius. *Biochemistry*, **45**, 6570–6580.
- 778 **Krink-Koutsoubelis, N., Loechner, A.C., Lechner, A., et al.** (2018) Engineered production of  
779 short-chain acyl-Coenzyme A esters in *Saccharomyces cerevisiae*. *ACS Synth. Biol.*, **7**,  
780 1105–1115.
- 781 **Krogh, A., Larsson, B., Heijne, G. von and Sonnhammer, E.** (2001) Predicting  
782 transmembrane protein topology with a hidden Markov model: Application to complete  
783 genomes. *J. Mol. Biol.*, **305**, 567–580.
- 784 **Kroon, J.T.M., Wei, W., Simon, W.J. and Slabas, A.R.** (2006) Identification and functional  
785 expression of a type 2 acyl-CoA:diacylglycerol acyltransferase (DGAT2) in developing  
786 castor bean seeds which has high homology to the major triglyceride biosynthetic enzyme  
787 of fungi and animals. *Phytochemistry*, **67**, 2541–2549.
- 788 **Lardizabal, K., Effertz, R., Levering, C., Mai, J., Pedroso, M.C., Jury, T., Aasen, E., Gruys,**  
789 **K. and Bennett, K.** (2008) Expression of *Umbelopsis ramanniana* DGAT2A in seed  
790 increases oil in soybean. *Plant Physiol.*, **148**, 89–96.
- 791 **Larson, T.R. and Graham, I. a.** (2001) A novel technique for the sensitive quantification of  
792 acyl CoA esters from plant tissues. *Plant J.*, **25**, 115–125.
- 793 **Letunic, I. and Bork, P.** (2016) Interactive tree of life (iTOL) v3: An online tool for the display  
794 and annotation of phylogenetic and other trees. *Nucleic Acids Res.*, **44**, W242–W245.

- 795 **Li, R., Yu, K. and Hildebrand, D.F.** (2010) *DGAT1*, *DGAT2* and *PDAT* expression in seeds  
796 and other tissues of epoxy and hydroxy fatty acid accumulating plants. *Lipids*, **45**, 145–57.
- 797 **Li, R., Yu, K., Wu, Y., et al.** (2012) *Vernonia* DGATs can complement the disrupted oil and  
798 protein metabolism in epoxygenase-expressing soybean seeds. *Metab. Eng.*, **14**, 29–38.
- 799 **Liu, B. and Benning, C.** (2013) Lipid metabolism in microalgae distinguishes itself. *Curr Opin*  
800 *Biotechnol.*, **24**, 300–309.
- 801 **Liu, J., Han, D., Yoon, K., Hu, Q. and Li, Y.** (2016) Characterization of type 2 diacylglycerol  
802 acyltransferases in *Chlamydomonas reinhardtii* reveals their distinct substrate specificities  
803 and functions in triacylglycerol biosynthesis. *Plant J.*, **86**, 3–19.
- 804 **Liu, J., Sun, Z., Mao, X., Gerken, H., Wang, X. and Yang, W.** (2019) Multi-omics analysis  
805 reveals distinct mechanism of oleaginousness in the emerging model alga *Chromochloris*  
806 *zofingiensis*. *Plant J.*, **98**, 1060–1077.
- 807 **Liu, Q., Siloto, R.M.P., Lehner, R., Stone, S.J. and Weselake, R.J.** (2012) Acyl-  
808 CoA:diacylglycerol acyltransferase: molecular biology, biochemistry and biotechnology.  
809 *Prog. Lipid Res.*, **51**, 350–377.
- 810 **Mandrup, S., Jepsen, R., Skøtt, H., Rosendal, J., Højrup, P., Kristiansen, K. and Knudsen,**  
811 **J.** (1993) Effect of heterologous expression of acyl-CoA-binding protein on acyl-CoA level  
812 and composition in yeast. *Biochem. J.*, **290**, 369–374.
- 813 **Mao, X., Wu, T., Kou, Y., Shi, Y., Zhang, Y. and Liu, J.** (2019) Characterization of type I and  
814 type II diacylglycerol acyltransferases from the emerging model alga *Chlorella zofingiensis*  
815 reveals their functional complementarity and engineering potential. *Biotechnol. Biofuels*, **12**,  
816 28.
- 817 **Marsh, J.A., Stadel, J.M., Ecker, D.J. and Crooke, S.T.** (1989) Ubiquitin fusion augments the  
818 yield of cloned gene products in *Escherichia coli*. *Proc. Natl. Acad. Sci.*, **86**, 2540–2544.
- 819 **McFie, P.J., Stone, S.L., Banman, S.L. and Stone, S.J.** (2010) Topological orientation of acyl-  
820 CoA:diacylglycerol acyltransferase-1 (DGAT1) and identification of a putative active site  
821 histidine and the role of the n terminus in dimer/tetramer formation. *J. Biol. Chem.*, **285**,  
822 37377–37387.



- 823 **Miao, R., Lung, S.-C., Li, X., Li, X.D. and Chye, M.-L.** (2019) Thermodynamic insights into  
824 an interaction between ACYL-COA-BINDING PROTEIN2 and LYSOPHOSPHOLIPASE2  
825 in *Arabidopsis*. *J. Biol. Chem.*, **294**, 6214–6226.
- 826 **Mietkiewska, E., Miles, R., Wickramaratna, A., Sahibollah, A.F., Greer, M.S., Chen, G.**  
827 **and Weselake, R.J.** (2014) Combined transgenic expression of *Punica granatum* conjugase  
828 (*FADX*) and *FAD2* desaturase in high linoleic acid *Arabidopsis thaliana* mutant leads to  
829 increased accumulation of punicic acid. *Planta*, **240**, 575–583.
- 830 **Mishra, S., Yadav, D.K. and Tuli, R.** (2006) Ubiquitin fusion enhances cholera toxin B subunit  
831 expression in transgenic plants and the plant-expressed protein binds GM1 receptors more  
832 efficiently. *J. Biotechnol.*, **127**, 95–108.
- 833 **Moreno, A.J., Venegas, M., Vaistij, F.E., Salas, J.J., Larson, T.R., Garcés, R., Graham, I.A.**  
834 **and Martínez, E.** (2014) Effect of a mutagenized acyl-ACP thioesterase FATA allele from  
835 sunflower with improved activity in tobacco leaves and *Arabidopsis* seeds. *Planta*, **239**,  
836 667–677.
- 837 **O’Quin, J.B., Mullen, R.T. and Dyer, J.M.** (2009) Addition of an N-terminal epitope tag  
838 significantly increases the activity of plant fatty acid desaturases expressed in yeast cells.  
839 *Appl. Microbiol. Biotechnol.*, **83**, 117–125.
- 840 **Oakes, J., Brackenridge, D., Colletti, R., et al.** (2011) Expression of fungal *diacylglycerol*  
841 *acyltransferase2* genes to increase kernel oil in maize. *Plant Physiol.*, **155**, 1146–1157.
- 842 **Pryor, K.D. and Leiting, B.** (1997) High-level expression of soluble protein in *Escherichia coli*  
843 using a His 6 -tag and maltose-binding-protein double-affinity fusion system. *Protein Expr.*  
844 *Purif.*, **10**, 309–319.
- 845 **Rahman, H., Harwood, J. and Weselake, R.** (2013) Increasing seed oil content in Brassica  
846 species through breeding and biotechnology. *Lipid Technol.*, **25**, 182–185.
- 847 **Ro, D., Paradise, E.M., Ouellet, M., et al.** (2006) Production of the antimalarial drug precursor  
848 artemisinic acid in engineered yeast. *Nature*, **440**, 940–943.
- 849 **Robinson, C. V, Chung, E.W., Kragelund, B.B., Knudsen, J., Aplin, R.T., Poulsen, F.M.**  
850 **and Dobson, C.M.** (1996) Probing the nature of noncovalent interactions by mass  
851 spectrometry. A study of protein - CoA ligand binding and assembly. *J. Am. Chem. Soc.*,

- 852           **118**, 8646–8653.
- 853   **Roesler, K., Shen, B., Bermudez, E., et al.** (2016) An improved variant of soybean type 1  
854           diacylglycerol acyltransferase increases the oil content and decreases the soluble  
855           carbohydrate content of soybeans. *Plant Physiol.*, **171**, 878–893.
- 856   **Roth, M.S., Cokus, S.J., Gallaher, S.D., et al.** (2017) Chromosome-level genome assembly and  
857           transcriptome of the green alga *Chromochloris zofingiensis* illuminates astaxanthin  
858           production. *Proc. Natl. Acad. Sci. U. S. A.*, **114**, E4296–E4305.
- 859   **Sandager, L., Gustavsson, M.H., Stahl, U., Dahlqvist, A., Wiberg, E., Banas, A., Lenman,**  
860           **M., Ronne, H. and Stymne, S.** (2002) Storage lipid synthesis is non-essential in yeast. *J*  
861           *Biol Chem*, **277**, 6478–6482.
- 862   **Schjerling, C.K., Hummel, R., Hansen, J.K., Børsting, C., Mikkelsen, J.M., Kristiansen, R.**  
863           **and Knudsen, J.** (1996) Disruption of the gene encoding the acyl-CoA-binding protein  
864           (ACB1) perturbs acyl-CoA metabolism in *Saccharomyces cerevisiae*. *J. Biol. Chem.*, **271**,  
865           22514–22521.
- 866   **Schneider, C.A., Rasband, W.S. and Eliceiri, K.W.** (2012) NIH Image to ImageJ: 25 years of  
867           image analysis. *Nat. Methods*, **9**, 671–675.
- 868   **Shockey, J.M., Gidda, S.K., Chapital, D.C., Kuan, J.-C.C., Dhanoa, P.K., Bland, J.M.,**  
869           **Rothstein, S.J., Mullen, R.T. and Dyer, J.M.** (2006) Tung tree DGAT1 and DGAT2 have  
870           nonredundant functions in triacylglycerol biosynthesis and are localized to different  
871           subdomains of the endoplasmic reticulum. *Plant Cell*, **18**, 2294–2313.
- 872   **Siloto, R.M.P., Madhavji, M., Wiehler, W.B., Burton, T.L., Boora, P.S., Laroche, A. and**  
873           **Weselake, R.J.** (2008) An N-terminal fragment of mouse DGAT1 binds different acyl-  
874           CoAs with varying affinity. *Biochem. Biophys. Res. Commun.*, **373**, 350–354.
- 875   **Singer, S.D., Chen, G., Mietkiewska, E., Tomasi, P., Jayawardhane, K., Dyer, J.M. and**  
876           **Weselake, R.J.** (2016) Arabidopsis GPAT9 contributes to synthesis of intracellular  
877           glycerolipids but not surface lipids. *J. Exp. Bot.*, **67**, 4627–4638.
- 878   **Sriram, S.M., Kim, B.Y. and Kwon, Y.T.** (2011) The N-end rule pathway: Emerging functions  
879           and molecular principles of substrate recognition. *Nat. Rev. Mol. Cell Biol.*, **12**, 735–747.

- 880 **Streatfield, S.J.** (2007) Approaches to achieve high-level heterologous protein production in  
881 plants. *Plant Biotechnol. J.*, **5**, 2–15.
- 882 **Tian, L. and Sun, S.S.M.** (2011) Ubiquitin fusion expression and tissue-dependent targeting of  
883 hG-CSF in transgenic tobacco. *BMC Biotechnol.*, **11**, 91.
- 884 **Turchetto-Zolet, A.C., Maraschin, F.S., Morais, G.L. De, Cagliari, A., Andrade, C.M.,**  
885 **Margis-Pinheiro, M. and Margis, R.** (2011) Evolutionary view of acyl-CoA  
886 diacylglycerol acyltransferase (DGAT), a key enzyme in neutral lipid biosynthesis. *BMC*  
887 *Evol. Biol.*, **11**, 263.
- 888 **Tzen, J., Cao, Y., Laurent, P., Ratnayake, C. and Huang, A.** (1993) Lipids, proteins, and  
889 structure of seed oil bodies from diverse species. *Plant Physiol.*, **101**, 267–276.
- 890 **Vanhercke, T., Divi, U.K., Tahchy, A. El, et al.** (2017) Step changes in leaf oil accumulation  
891 via iterative metabolic engineering. *Metab. Eng.*, **39**, 237–246.
- 892 **Vanhercke, T., Tahchy, A. El, Shrestha, P., Zhou, X.-R.R., Singh, S.P. and Petrie, J.R.**  
893 (2013) Synergistic effect of WR11 and DGAT1 coexpression on triacylglycerol biosynthesis  
894 in plants. *FEBS Lett.*, **587**, 364–9.
- 895 **Ward, J.J., McGuffin, L.J., Bryson, K., Buxton, B.F. and Jones, D.T.** (2004) The  
896 DISOPRED server for the prediction of protein disorder. *Bioinformatics*, **20**, 2138–2139.
- 897 **Wei, H., Shi, Y., Ma, X., Pan, Y., Hu, H., Li, Y., Luo, M., Gerken, H. and Liu, J.** (2017) A  
898 type-I diacylglycerol acyltransferase modulates triacylglycerol biosynthesis and fatty acid  
899 composition in the oleaginous microalga, *Nannochloropsis oceanica*. *Biotechnol. Biofuels*,  
900 **10**, 174.
- 901 **Weselake, R.J., Madhavji, M., Szarka, S.J., et al.** (2006) Acyl-CoA-binding and self-  
902 associating properties of a recombinant 13.3 kDa N-terminal fragment of diacylglycerol  
903 acyltransferase-1 from oilseed rape. *BMC Biochem.*, **7**, 24.
- 904 **Weselake, R.J., Pomeroy, M.K., Furukawa, T.L., Golden, J.L., Little, D.B. and Laroche, A.**  
905 (1993) Developmental profile of diacylglycerol acyltransferase in maturing seeds of oilseed  
906 rape and safflower and microspore-derived cultures of oilseed rape. *Plant Physiol.*, **102**,  
907 565–571.

- 908 **Weselake, R.J., Shah, S., Tang, M., et al.** (2008) Metabolic control analysis is helpful for  
909 informed genetic manipulation of oilseed rape (*Brassica napus*) to increase seed oil content.  
910 *J. Exp. Bot.*, **59**, 3543–3549.
- 911 **Xin, Y., Lu, Y., Lee, Y.-Y.Y., et al.** (2017) Producing designer oils in industrial microalgae by  
912 rational modulation of co-evolving type-2 diacylglycerol acyltransferases. *Mol. Plant*, **10**,  
913 1523–1539.
- 914 **Xin, Y., Shen, C., She, Y., et al.** (2018) Biosynthesis of triacylglycerol molecules with tailored  
915 PUFA profile in industrial microalgae. *Mol. Plant*.
- 916 **Xu, Y., Caldo, K.M.P., Pal-Nath, D., Ozga, J., Lemieux, M.J., Weselake, R.J. and Chen, G.**  
917 (2018) Properties and biotechnological applications of acyl-CoA:diacylglycerol  
918 acyltransferase and phospholipid:diacylglycerol acyltransferase from terrestrial plants and  
919 microalgae. *Lipids*, **53**, 663–688.
- 920 **Xu, Y., Chen, G., Greer, M.S., et al.** (2017) Multiple mechanisms contribute to increased  
921 neutral lipid accumulation in yeast producing recombinant variants of plant diacylglycerol  
922 acyltransferase 1. *J. Biol. Chem.*, **292**, 17819–17831.
- 923 **Xu, Y., Falarz, L. and Chen, G.** (2019) Characterization of type-2 diacylglycerol  
924 acyltransferases in the green microalga *Chromochloris zofingiensis*. *J. Agric. Food Chem.*,  
925 **67**, 291–298.
- 926 **Xu, Y., Holic, R., Li, D., Pan, X., Mietkiewska, E., Chen, G., Ozga, J., Weselake, R.J. and**  
927 **Holic, R.** (2018) Substrate preferences of long-chain acyl-CoA synthetase and  
928 diacylglycerol acyltransferase contribute to enrichment of flax seed oil with  $\alpha$ -linolenic acid.  
929 *Biochem. J.*, **475**, 1473–1489.
- 930 **Yurchenko, O.P., Nykiforuk, C.L., Moloney, M.M., Ståhl, U., Banaś, A., Stymne, S. and**  
931 **Weselake, R.J.** (2009) A 10-kDa acyl-CoA-binding protein (ACBP) from *Brassica napus*  
932 enhances acyl exchange between acyl-CoA and phosphatidylcholine. *Plant Biotechnol. J.*, **7**,  
933 602–610.
- 934 **Yurchenko, O.P. and Weselake, R.J.** (2011) Involvement of low molecular mass soluble acyl-  
935 CoA-binding protein in seed oil biosynthesis. *N. Biotechnol.*, **28**, 97–109.
- 936 **Zou, J., Wei, Y., Jako, C., Kumar, A., Selvaraj, G. and Taylor, D.C.** (1999) The *Arabidopsis*

937 *thaliana* TAG1 mutant has a mutation in a diacylglycerol acyltransferase gene. *Plant J.*, **19**,  
938 645–653.

939 **Zulu, N.N., Popko, J., Zienkiewicz, K., Tarazona, P., Herrfurth, C. and Feussner, I.** (2017)  
940 Heterologous co-expression of a yeast diacylglycerol acyltransferase (ScDGA1) and a plant  
941 oleosin (AtOLEO3) as an efficient tool for enhancing triacylglycerol accumulation in the  
942 marine diatom *Phaeodactylum tricornutum*. *Biotechnol. Biofuels*, **10**, 187.

943

944

945 **TABLES**

946

947 **Table 1. Apparent kinetic parameters of CzDGAT1 variants.** DGAT activity was examined  
948 at increasing oleoyl-CoA concentration from 0.1 to 7.5 or 10  $\mu\text{M}$ . Data were fitted to a nonlinear  
949 regression using allosteric sigmoidal equation with GraphPad Prism software. Data shown are  
950 means  $\pm$  S.D. (n=3).

951

| Enzyme                                                    | DGAT1 <sub>1-550</sub> | DGAT1 <sub>81-550</sub> | ACBP-<br>DGAT1 <sub>1-550</sub> | ACBP-<br>DGAT1 <sub>81-550</sub> |
|-----------------------------------------------------------|------------------------|-------------------------|---------------------------------|----------------------------------|
| Apparent $V_{\text{max}}$ (pmol<br>TAG/min/mg<br>protein) | 276.8 $\pm$ 6.94       | 17.14 $\pm$ 0.28        | 436.7 $\pm$ 10.1                | 34.54 $\pm$ 1.27                 |
| Hill coefficient                                          | 1.39 $\pm$ 0.06        | 1.71 $\pm$ 0.06         | 1.91 $\pm$ 0.12                 | 1.57 $\pm$ 0.14                  |
| Apparent $S_{0.5}$ ( $\mu\text{M}$ )                      | 1.48 $\pm$ 0.07        | 1.83 $\pm$ 0.05         | 0.94 $\pm$ 0.04                 | 1.50 $\pm$ 0.10                  |
| Goodness of Fit/ $R^2$                                    | 0.994                  | 0.995                   | 0.981                           | 0.973                            |

952

953

954 **FIGURE LEGENDS**

955 **Figure 1. Phylogenetic relationship among CzDGAT1 and DGAT1 from other organisms.**

956 The organism and Phytozome/GenBank accession number/JGI protein ID for each protein  
957 sequence are shown as follows: *Auxenochlorella protothecoides*, *Ap*, ApDGAT1  
958 (XP\_011402032); *Arabidopsis thaliana*, *At*, AtDGAT1 (NM\_127503); *Brassica napus*, *Bn*,  
959 BnDGAT1 (JN224473); *Bos taurus*, *Bt*, BtDGAT1 (AAL49962); *Caenorhabditis elegans*, *Cae*,  
960 CaeDGAT1 (NM\_001269372); *Chlorella ellipsoidea*, *Che*, CheDGAT1 (KT779429);  
961 *Chlamydomonas reinhardtii*, *Cre*, CreDGAT1 (Cre01.g045903); *Camelina sativa*, *Cs*,  
962 CsDGAT1 (XM\_010417066); *Coccomyxa subellipsoidea* C-169, *Csu*, CsuDGAT1 (54084);  
963 *Chlorella vulgaris*, *Cv*, CvDGAT1 (ALP13863); *Chromochloris zofingiensis*, *Cz*, CzDGAT1A  
964 (MH523419), CzDGAT1B (Cz09g08290); *Drosophila melanogaster*, *Dm*, DmDGAT1  
965 (AF468649); *Danio rerio*, *Dr*, DrDGAT1 (NM\_199730); *Euonymus alatus*, *Ea*, EaDGAT1  
966 (AY751297); *Glycine max*, *Gm*, GmDGAT1 (AY496439); *Helianthus annuus*, *Ha*, HaDGAT1  
967 (HM015632); *Homo sapiens*, *Hs*, HsDGAT1 (NM\_012079); *Jatropha curcas*, *Jc*, JcDGAT1  
968 (DQ278448); *Klebsormidium nitens*, *Kn*, KnDGAT1 (GAQ91878); *Linum usitatissimum*, *Lu*,  
969 LuDGAT1 (KC485337); *Monodelphis domestica*, *Md*, MdDGAT1 (XM\_007488766); *Mus*  
970 *musculus*, *Mm*, MmDGAT1 (AF078752); *Medicago truncatula*, *Mt*, MtDGAT1  
971 (XM\_003595183); *Nannochloropsis oceanica*, *No*, NoDGAT1 (KY073295); *Nicotiana tabacum*,  
972 *Nt*, NtDGAT1 (AF129003); *Nematostella vectensis*, *Nv*, NvDGAT1 (XM\_001639301); *Olea*  
973 *europae*, *Oe*, OeDGAT1 (AY445635); *Oryza sativa*, *Os*, OsDGAT1 (NM\_001061404);  
974 *Paracoccidioides brasiliensis*, *Pb*, PbDGAT1 (EEH17170); *Perilla frutescens*, *Pf*, PfDGAT1  
975 (AF298815); *Populus trichocarpa*, *Pot*, PotDGAT1 (XM\_006371934); *Physcomitrella patens*,  
976 *Pp*, PpDGAT1 (XM\_001770877); *Phaeodactylum tricorutum*, *Pt*, PtDGAT1 (HQ589265);  
977 *Ricinus communis*, *Rc*, RcDGAT1 (NM\_001323734); *Rattus norvegicus*, *Rn*, RnDGAT1  
978 (AB062759); *Sesamum indicum*, *Si*, SiDGAT1 (JF499689); *Sus scrofa*, *Ss*, SsDGAT1  
979 (NM\_214051); *Trichoplax adhaerens*, *Ta*, TaDGAT1 (XM\_002111989); *Toxoplasma gondii*, *Tg*,  
980 TgDGAT1 (AY327327); *Tropaeolum majus*, *Tm*, TmDGAT1 (AY084052); *Thalassiosira*  
981 *pseudonana*, *Tp*, TpDGAT1 (XM\_002287179); *Vernicia fordii*, *Vf*, VfDGAT1 (DQ356680);  
982 *Vernonia galamensis*, *Vg*, VgDGAT1 (EF653276); *Vitis vinifera*, *Vv*, VvDGAT1 (CAN80418);  
983 *Yarrowia lipolytica*, *Yl*, YlDGAT1 (XM\_502557); and *Zea mays*, *Zm*, ZmDGAT1 (EU039830).  
984 DGAT1s from the animal, fungal, green algal, and plant groups are shown in orange, blue, pink



985 and green, respectively. Algal DGAT1s are shown by red bars. The length of the N-terminus of  
986 DGAT1 is shown as a heat map (circle).

987

988 **Figure 2. CzDGAT1 encodes an active enzyme and has a unique N-terminus with less**  
989 **propensity to become disordered.** A and B, Triacylglycerol (TAG) content (A) and fatty acid  
990 (FA) composition (B) in yeast producing CzDGAT1 cultured in the absence of FA or the  
991 presence of exogenous linoleic acid ( $18:2\Delta^{9cis,12cis}$ , 18:2), or  $\alpha$ -linolenic acid ( $C18:3\Delta^{9cis,12cis,15cis}$ ,  
992 18:3). Yeast cells were harvested after 48 h of induction for lipid analysis. C16:0, Palmitic acid;  
993 C18:0, Stearic acid; C18:1, Oleic acid. C, *In vitro* DGAT assay using yeast microsomal fractions  
994 containing recombinant CzDGAT1. D, Sequence alignment of the N-terminal regions of DGAT1.  
995 *At*, *Arabidopsis thaliana*; *Bn*, *Brassica napus*; *Cv*, *Chlorella vulgaris*; *Cz*, *Chromochloris*  
996 *zofingiensis*; *No*, *Nannochloropsis oceanica*. E and F, Prediction of intrinsic disorder profile  
997 (blue) of the N-terminal regions of CzDGAT1 (D) and BnDGAT1 (E) and likelihood to  
998 participate in protein-protein interaction (red) by DISOPRED analysis (Ward *et al.*, 2004). For A,  
999 B and C, data represent means  $\pm$  S.D. (n = 3).

1000

1001 **Figure 3. Truncation analysis of the N-terminal domain CzDGAT1.** A, Predicted topology of  
1002 CzDGAT1 by TMHMM (Krogh *et al.*, 2001). CzDGAT1 has a 107-amino acid residue-long  
1003 hydrophilic N-terminal region, followed by 9 predicted transmembrane domains (TMDs). The  
1004 numbers indicate the different truncation points. B, Protein production level of the full-length  
1005 (CzDGAT1<sub>1-550</sub>) and N-terminal truncated (CzDGAT1<sub>81-550</sub> and CzDGAT1<sub>107-550</sub>) CzDGAT1  
1006 variant proteins. The enzyme amount was semi-quantified by Image J software (Schneider *et al.*,  
1007 2012). C, *In vitro* DGAT activity of CzDGAT1<sub>1-550</sub>, CzDGAT1<sub>81-550</sub> or CzDGAT1<sub>107-550</sub>. D,  
1008 Normalized DGAT activity of CzDGAT1<sub>1-550</sub>, CzDGAT1<sub>81-550</sub> or CzDGAT1<sub>107-550</sub>. Normalized  
1009 activity was calculated by dividing the activity value by the corresponding protein accumulation.  
1010 Data represent means  $\pm$  S.D. (n = 3).

1011

1012 **Figure 4. N-terminal fusion of an acyl-CoA binding protein (ACBP) with CzDGAT1 and its**  
1013 **N-terminal truncation mutants.** A, Protein production level of the full-length CzDGAT1

1014 (DGAT1<sub>1-550</sub>), N-terminal truncated CzDGAT1 (DGAT1<sub>81-550</sub> and DGAT1<sub>107-550</sub>) and their  
1015 corresponding ACBP fused proteins (ACBP-DGAT1<sub>1-550</sub>, ACBP-DGAT1<sub>81-550</sub> and ACBP-  
1016 DGAT1<sub>107-550</sub>). The enzyme amount was semi-quantified by Image J software (Schneider *et al.*,  
1017 2012). B, *In vitro* DGAT activity of the full-length, N-terminal truncated and ACBP fused  
1018 CzDGAT1 proteins. C, Normalized DGAT activity of the full-length, N-terminal truncated and  
1019 ACBP fused CzDGAT1 proteins. Normalized activity was calculated by dividing the activity  
1020 value by the corresponding protein accumulation. Data represent means  $\pm$  S.D. (n = 3).

1021

1022 **Figure 5. N-terminal fusion of an acyl-CoA binding protein (ACBP) with CzDGAT1**  
1023 **kinetically improves the enzyme.** A-D, DGAT activities of the full-length CzDGAT1  
1024 (DGAT1<sub>1-550</sub>), N-terminal truncated CzDGAT1 (DGAT1<sub>81-550</sub>) and their corresponding ACBP  
1025 fused proteins (ACBP-DGAT1<sub>1-550</sub> and ACBP-DGAT1<sub>81-550</sub>) at oleoyl-CoA concentration from  
1026 0.1-7.5 or 10  $\mu$ M. Data were fitted to the allosteric sigmoidal equation using GraphPad Prism.  
1027 Data represent means  $\pm$  S.D. (n = 3).

1028

1029 **Figure 6. Fusion of acyl-CoA binding protein (ACBP) with CzDGAT1 boosts oil production**  
1030 **in yeast and *Nicotiana benthamiana* leaves.** A, Neutral lipid accumulation in yeast production  
1031 ACBP-fused DGAT1. B, Triacylglycerol (TAG) content in transiently transformed *N.*  
1032 *benthamiana* leaves. All cDNAs were constitutively expressed under the *CaMV 35S* promoter  
1033 with the co-expression of the *p19* vector and *Arabidopsis thaliana Wrinkled1* (*AtWRI1*). C, Fatty  
1034 acid composition of TAG in in transiently transformed *N. benthamiana* leaves. D, Subcellular  
1035 localization of ACBP-fused DGAT1 in *N. benthamiana* leaf cells. Venus-tagged DGAT1 or  
1036 ACBP-DGAT1 was co-localized with C-terminal SCFP3A tagged *Arabidopsis thaliana*  
1037 glycerol-3-phosphate acyltransferase (*AtGPAT9*), a known endoplasmic reticulum (ER)  
1038 localized protein. Scale bars represent 20  $\mu$ m. E, Fluorescence intensity of ACBP-fused DGAT1.  
1039 *N. benthamiana* leaves transiently expressing *Venus-DGAT1* or *Venus-ACBP-DGAT1* and the  
1040 *p19* vector were used to quantify the fluorescent intensity. F, Western-blot immunodetection  
1041 detection against V5 tagged ACBP-fused DGAT1 or DGAT1 on *N. benthamiana* leaf proteins.  
1042 Coomassie Blue staining of duplicate leaf protein samples separated on SDS-PAGE gel is shown  
1043 as a loading control. G, Relative protein accumulation levels of ACBP-fused DGAT1 or DGAT1

1044 in *N. benthamiana* leaf cells based on western blot analysis. The enzyme amount was semi-  
1045 quantified by Image J software (Schneider *et al.*, 2012). C16:0, Palmitic acid; C18:0, Stearic acid;  
1046 C18:1, Oleic acid; C18:2, Linoleic acid; C18:3,  $\alpha$ -linolenic acid; p19, p19 + AtWRI1; DGAT1<sub>1-</sub>  
1047 <sub>550</sub>, p19 + AtWRI1 + CzDGAT1<sub>1-550</sub>; ACBP-DGAT1<sub>1-550</sub>, p19 + AtWRI1 + ACBP fused  
1048 CzDGAT1<sub>1-550</sub>; ACBP+DGAT1<sub>1-550</sub>, p19 + AtWRI1 + ACBP + CzDGAT1<sub>1-550</sub>; DGAT1<sub>81-550</sub>,  
1049 p19 + AtWRI1 + CzDGAT1<sub>81-550</sub>; ACBP-DGAT1<sub>81-550</sub>, p19 + AtWRI1 + ACBP fused  
1050 CzDGAT1<sub>81-550</sub>; ACBP+DGAT1<sub>81-550</sub>, p19 + AtWRI1 + ACBP + CzDGAT1<sub>81-550</sub>. Data represent  
1051 means  $\pm$  S.D. For A and G, n=3; for B and C, n=7; for E, n=4. The asterisk and pound sign  
1052 indicate  $P < 0.05$  as determined by paired one-tailed T-test.

# Fig.1

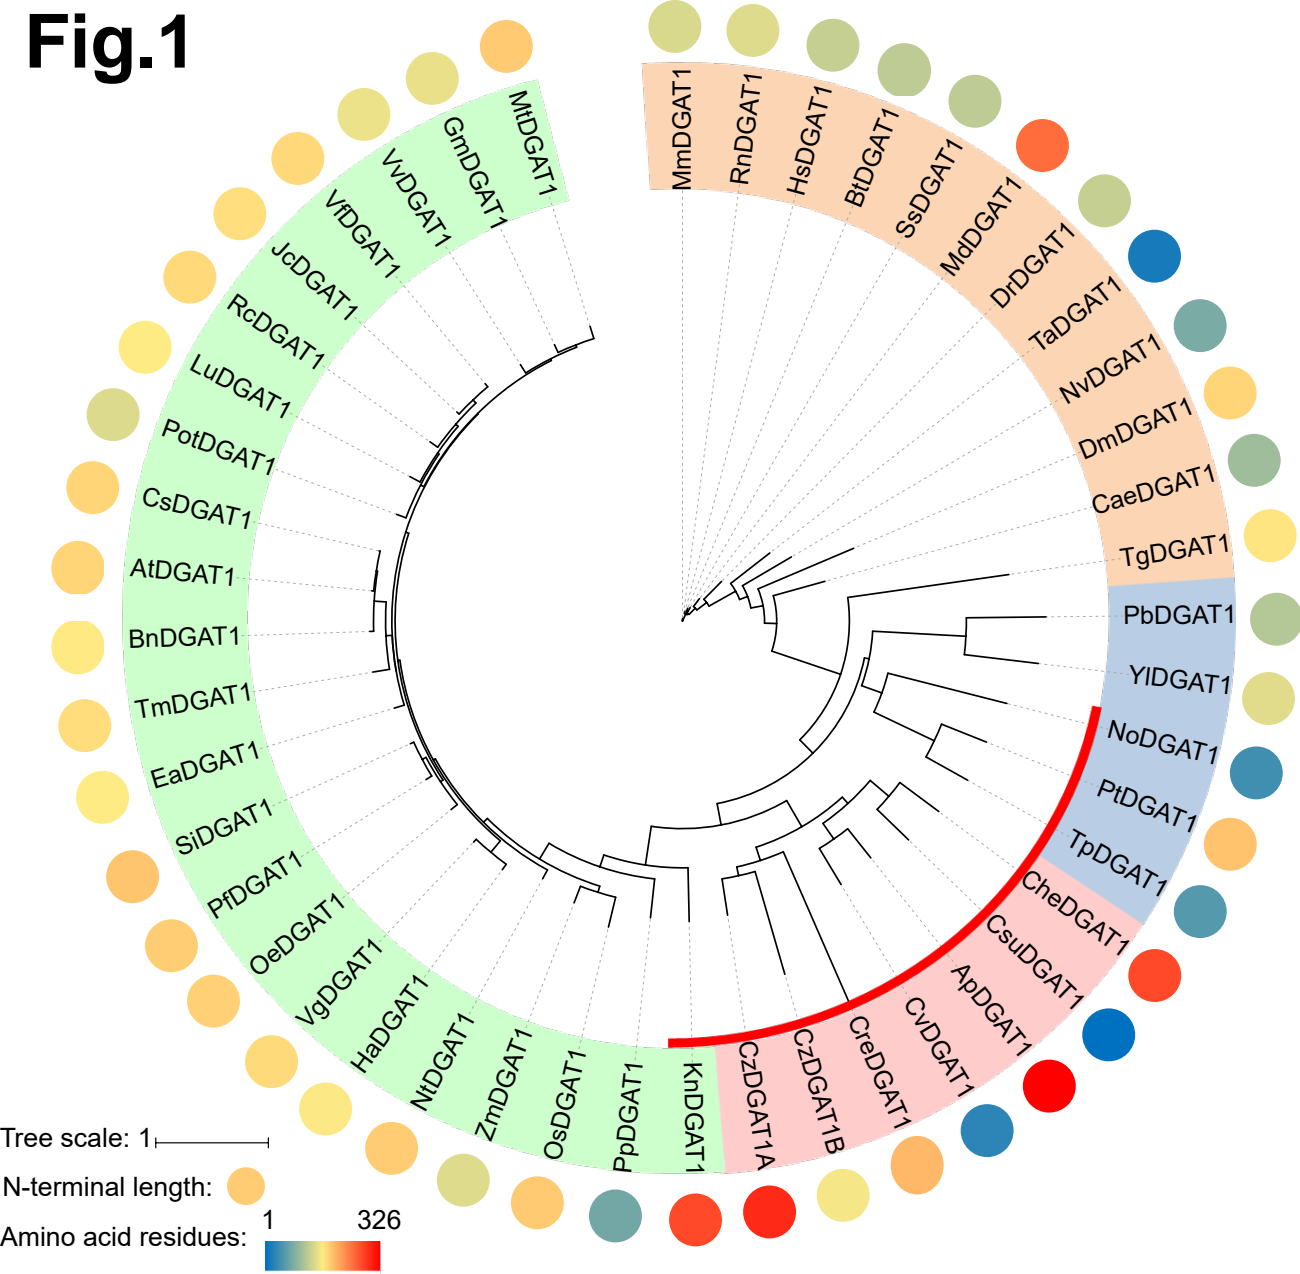

# Fig.2

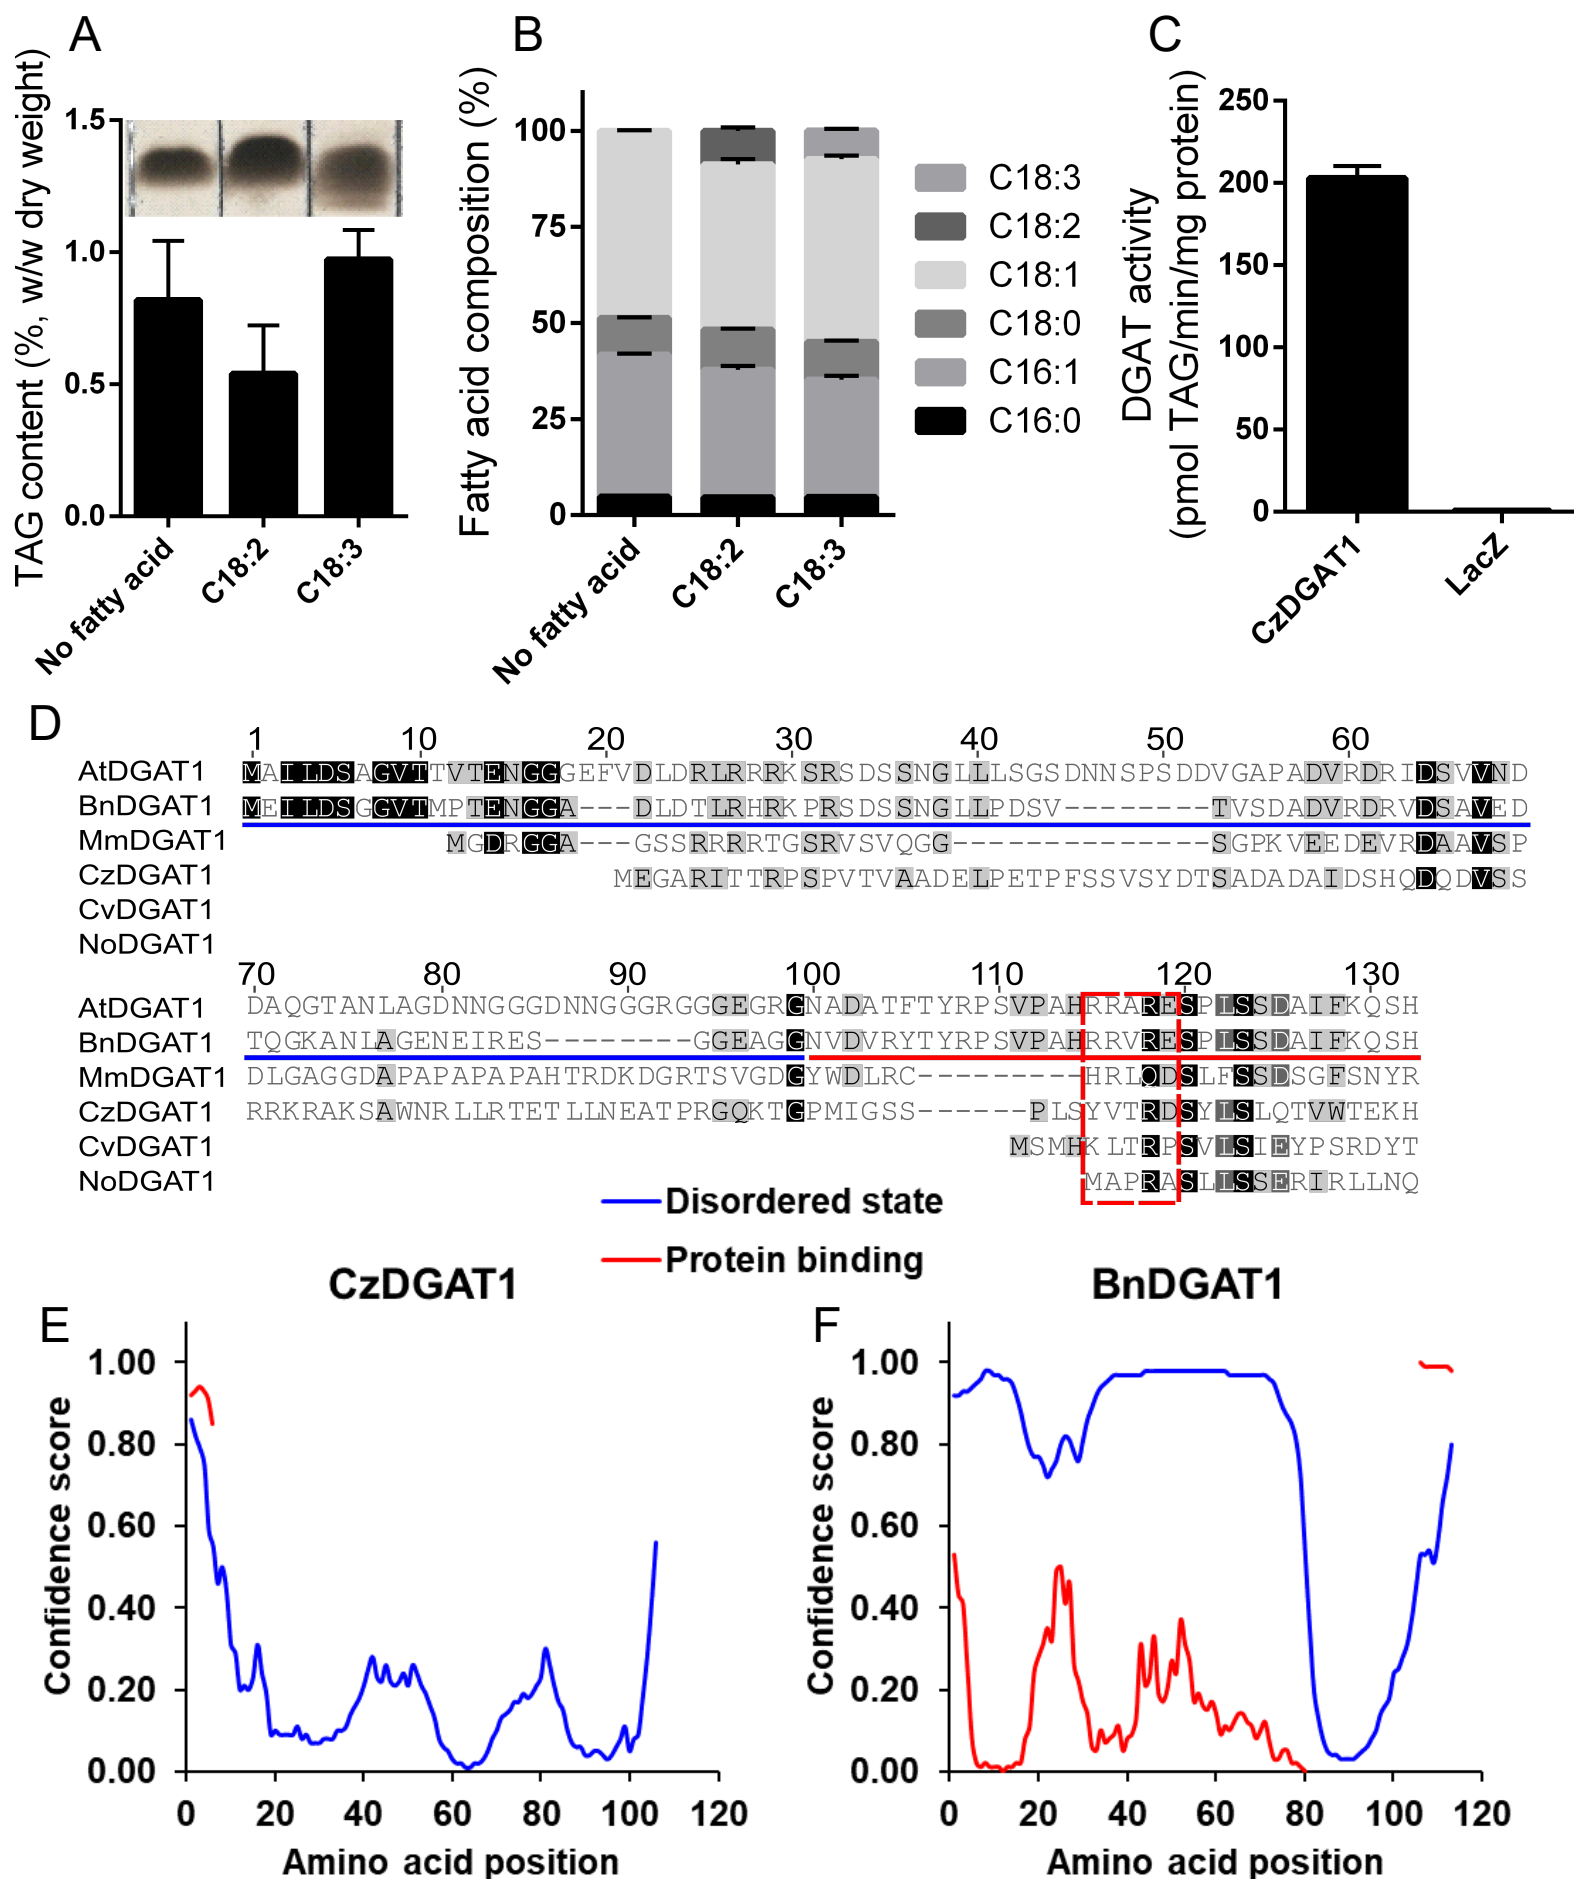

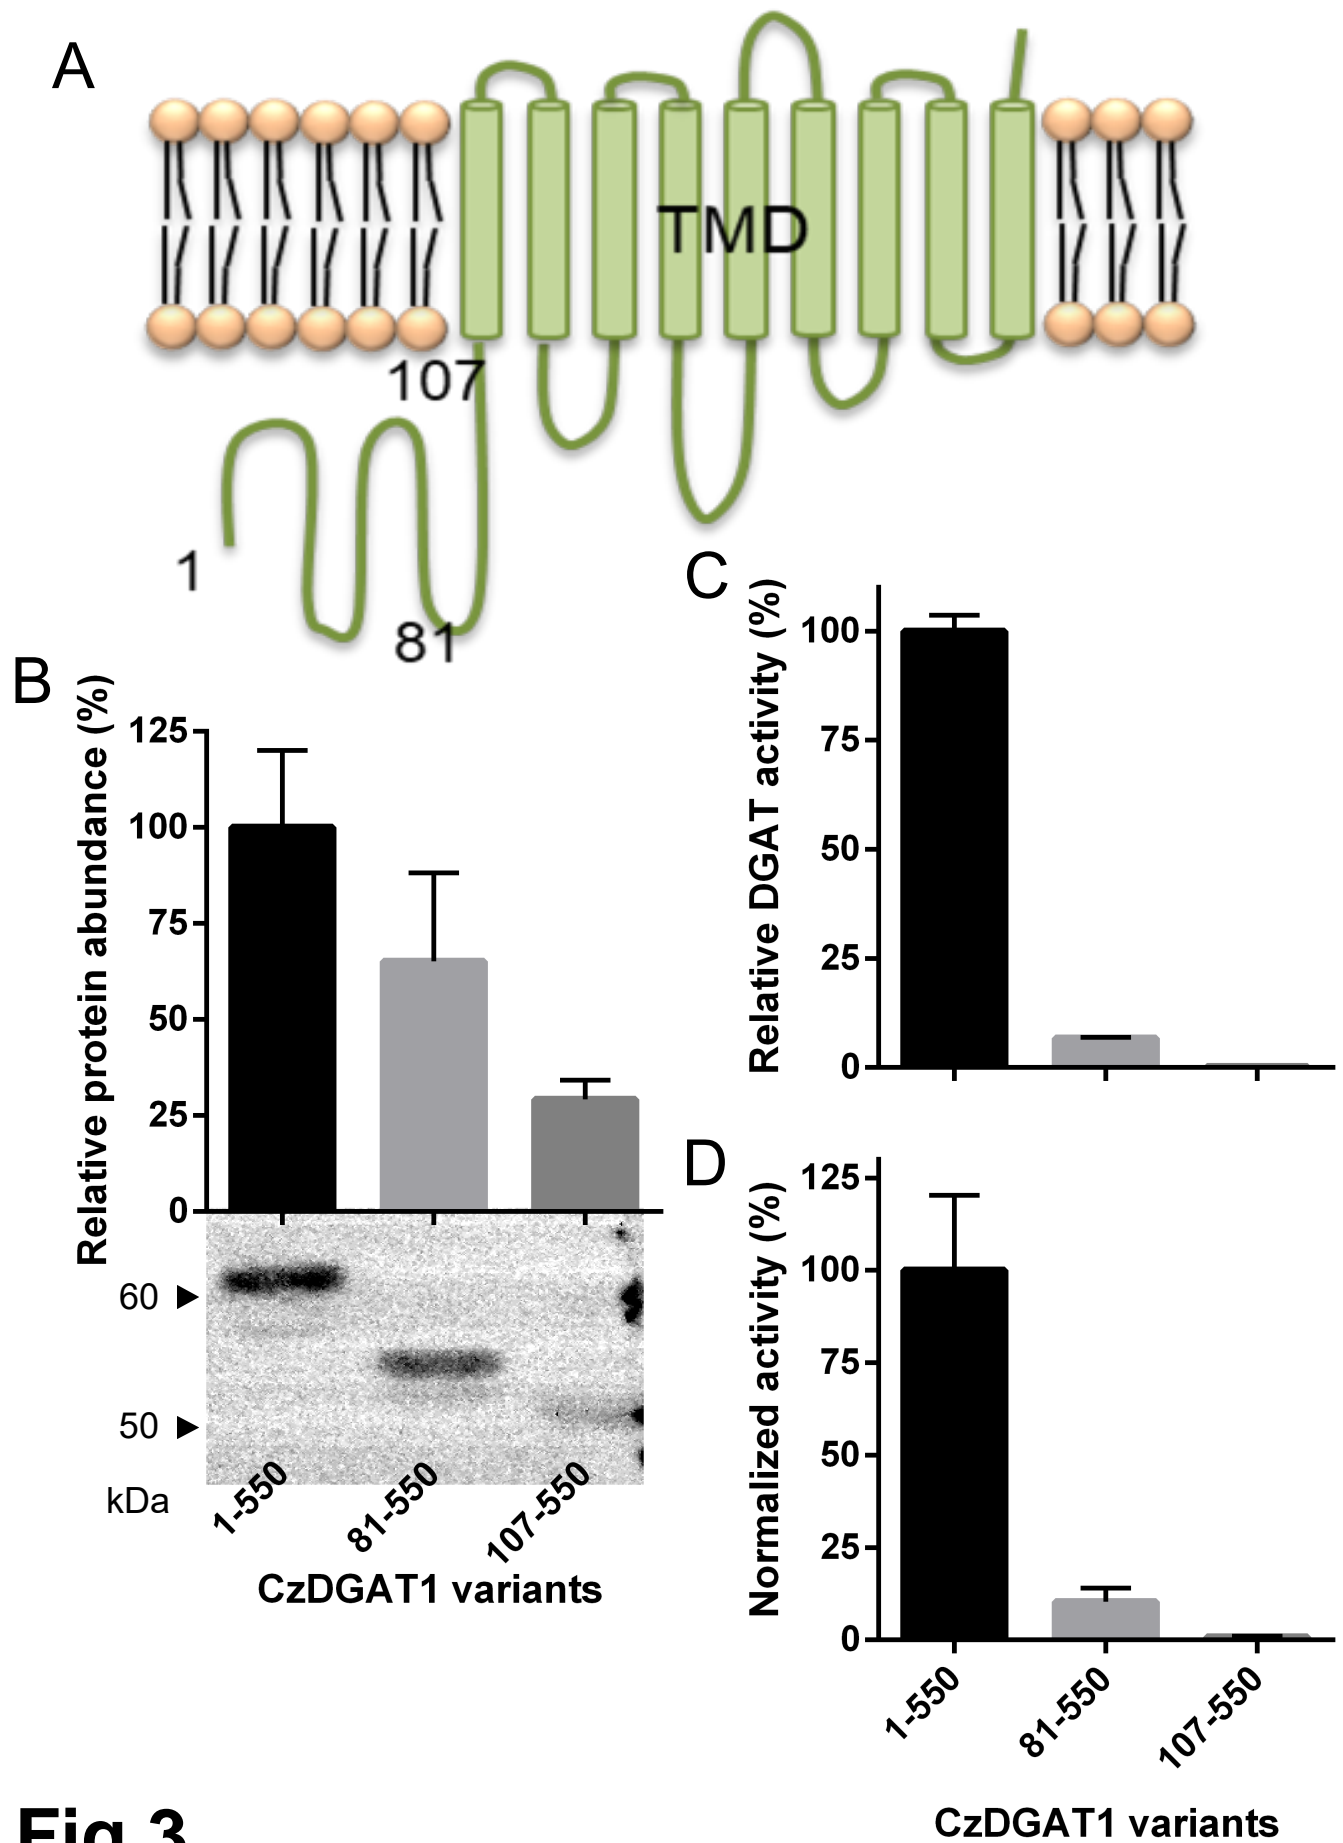

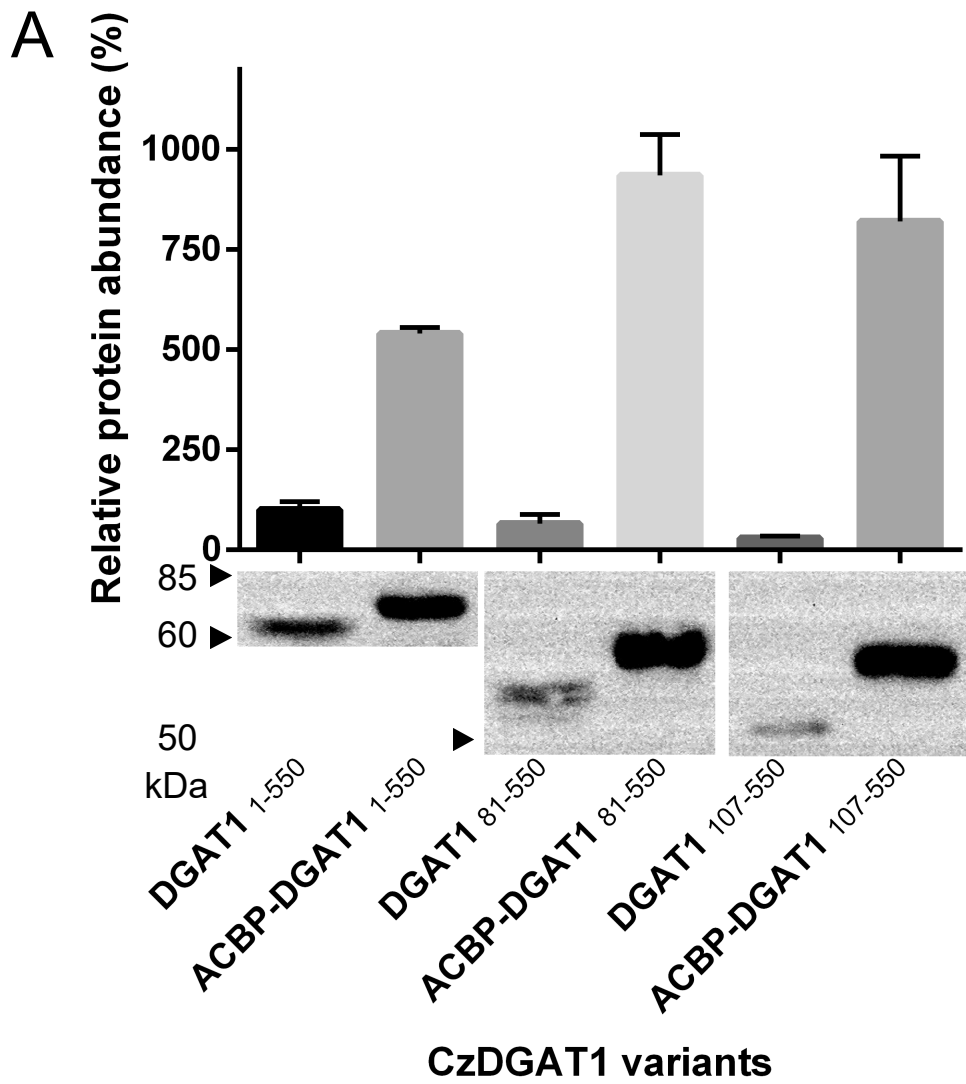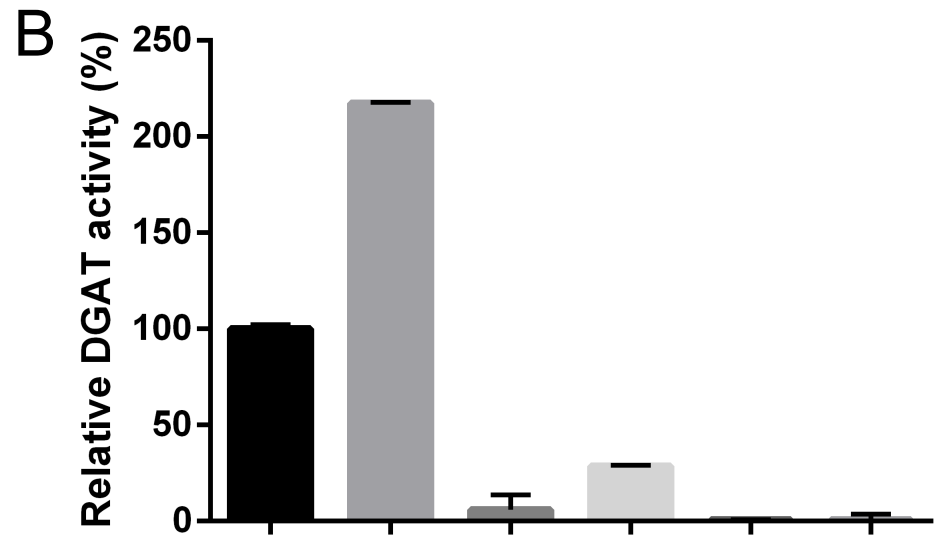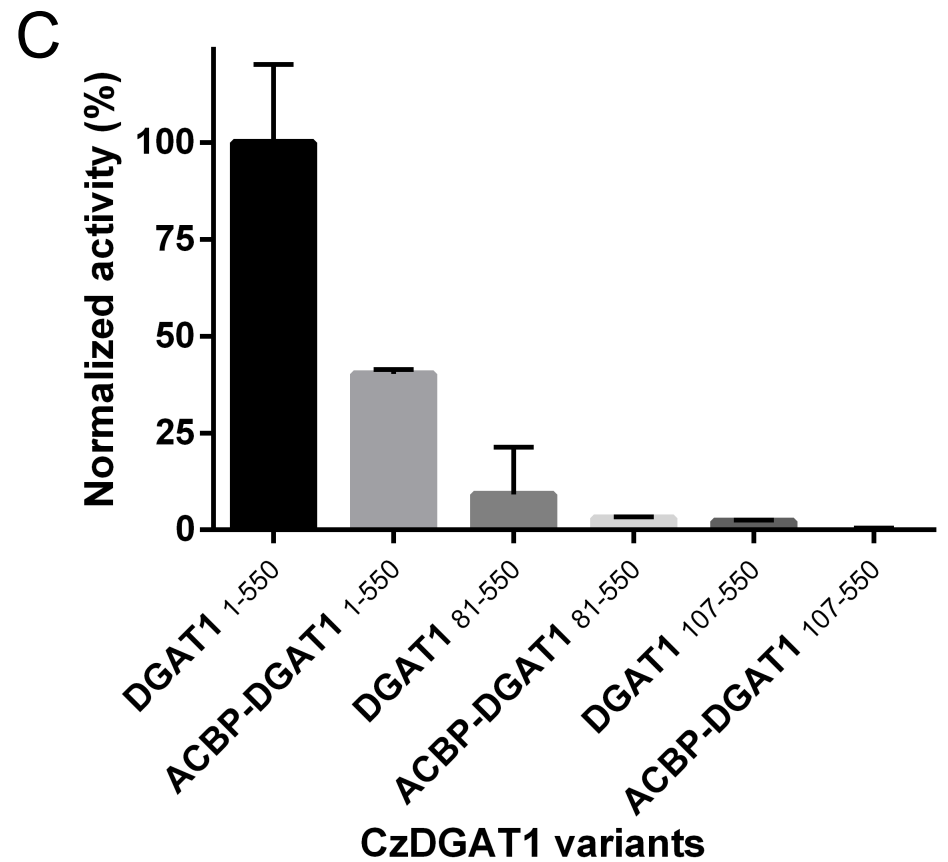

**Fig.4**



**Fig.5**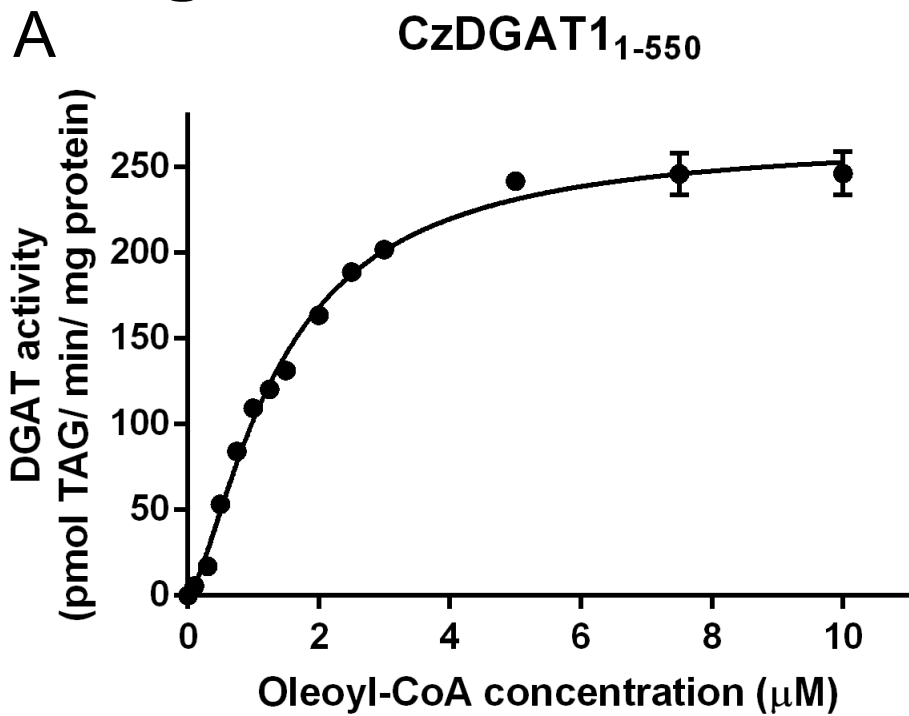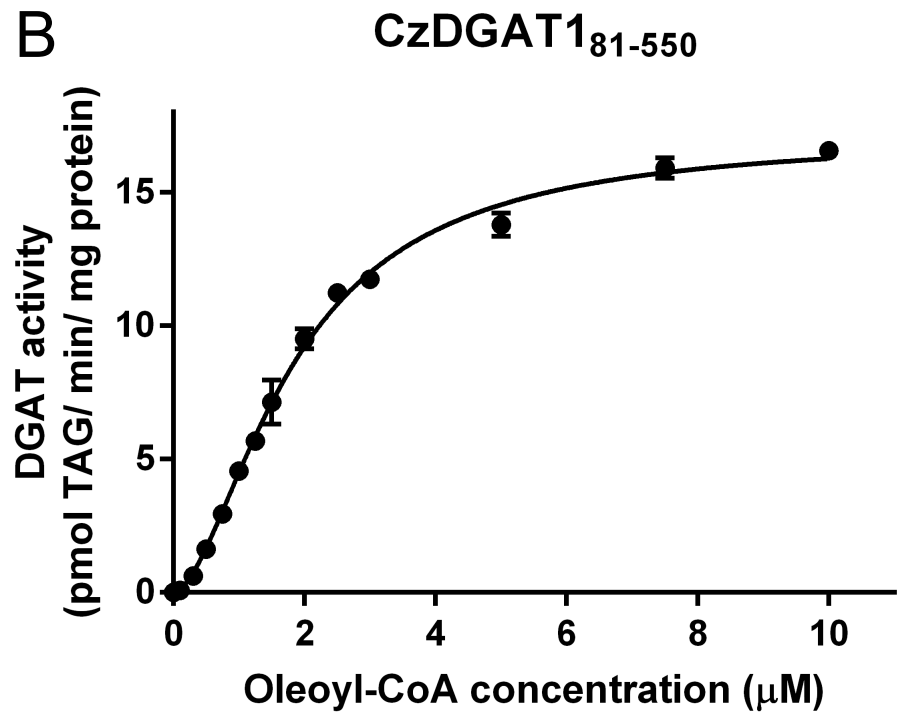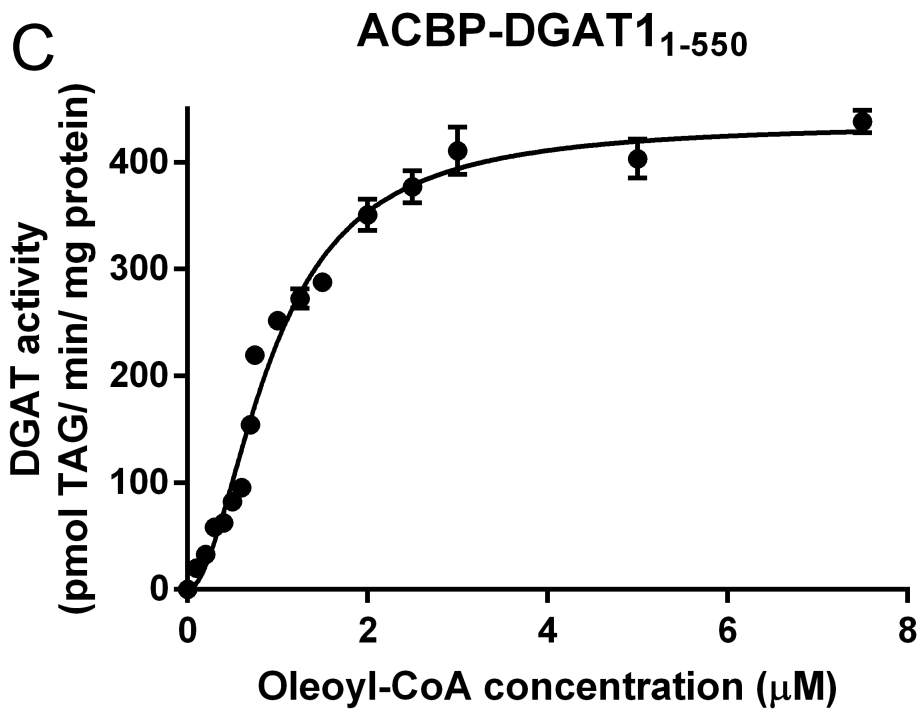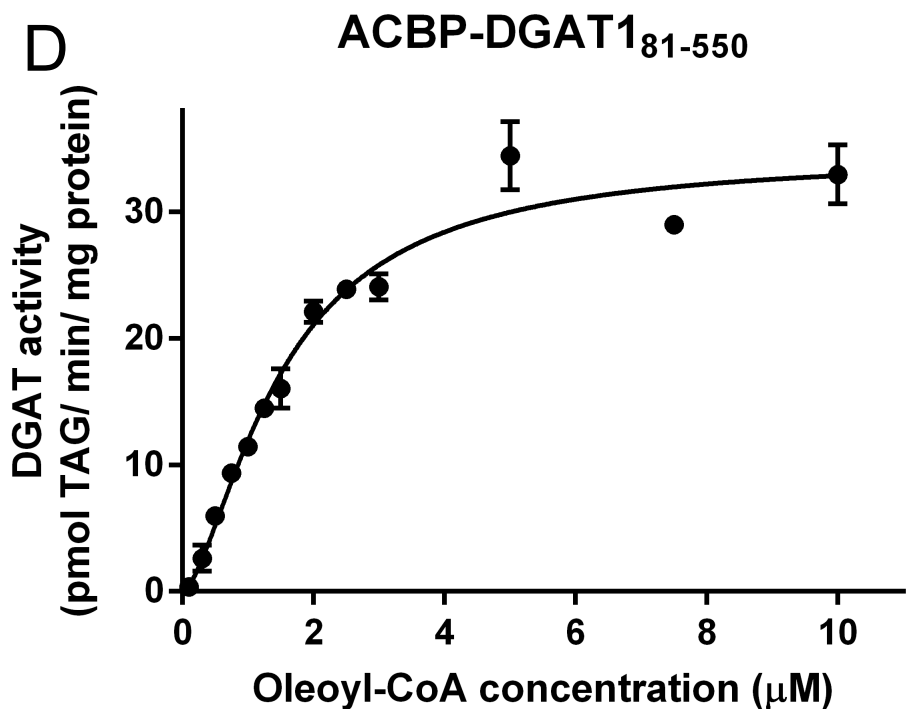

# Fig.6

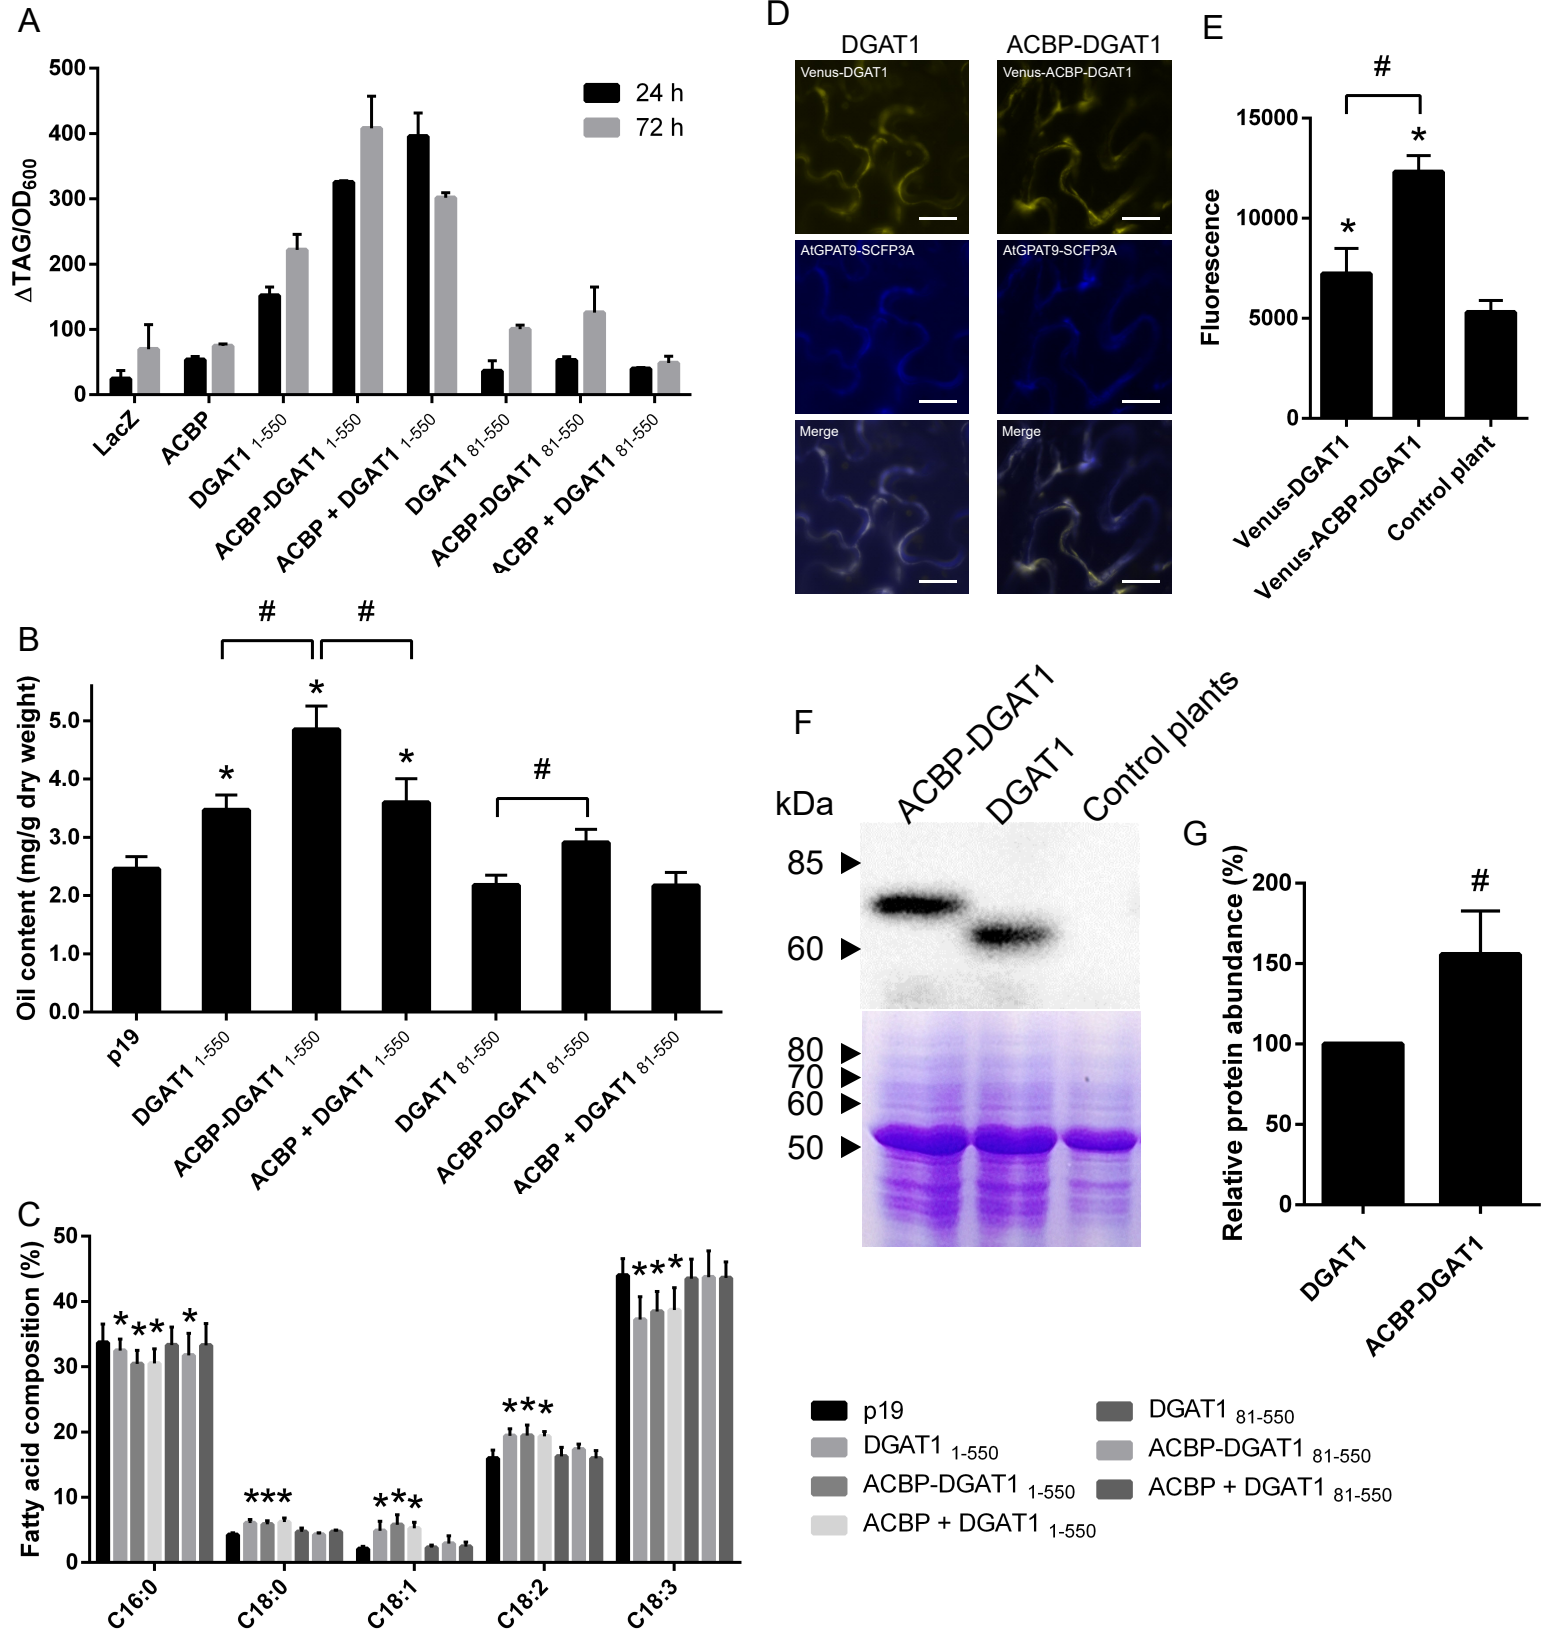

Source: https://www.biorxiv.org/content/10.1101/2019.12.21.885871v1.full.pdf
