# Supplementary material for: Kinetic improvement of an algal diacylglycerol acyltransferase 1 via fusion with an acyl-CoA binding protein
Source: bioRxiv or medRxiv preprint supplement (doi:10.1101/2019.12.21.885871), 2019-12-23
Supplement: Supplementary file [file media-1.pdf]

## SUPPORTING INFORMATION

### Method S1. Membrane yeast two-hybrid assay.

**Table S1. DGAT1 proteins used for multiple sequence alignment.** The topology organization of DGAT1 was predicted using TMHMM (Krogh *et al.*, 2001). TMD, transmembrane domain.

**Table S2. Apparent kinetic parameters of CzDGAT1 variants using a combined model accounting for sigmoidicity and substrate inhibition** (Xu *et al.*, 2017). DGAT activity was examined at increasing oleoyl-CoA concentration from 0.1 to 25  $\mu$ M. Data were fitted to a nonlinear regression using a combined model accounting for sigmoidicity and substrate inhibition with the GraphPad Prism software. Data shown are means  $\pm$  S.D. (n=3).

**Table S3. Primers used in the current study.** A restriction site or linker is shown in **bold and underlined** and a Kozak translation initiation sequence for yeast expression is shown in *italic*.

**Figure S1. Alignment of DGAT1 from different species.** Alignment was virtualized by Geneious v5.3 (Drummond *et al.*, 2010).

**Figure S2. Prediction of intrinsic disorder profile (blue) of the N-terminal region of DGAT1 from representative algae, plant and animals and its likelihood to participate in protein-protein interaction (red).** The analyses were performed by DISOPRED (Ward *et al.*, 2004). *At*, *Arabidopsis thaliana*; *Kn*, *Klebsormidium nitens*; *Cz*, *Chromochloris zofingiensis*; *Pt*, *Phaeodactylum tricornutum*; *Tp*, *Thalassiosira pseudonana*.

**Figure S3. DGAT activity of CzDGAT1 variant enzymes at high oleoyl-CoA concentrations.** A-D, DGAT activities of the full-length CzDGAT1 (DGAT1<sub>1-550</sub>), N-terminal

truncated CzDGAT1 (DGAT1<sub>81-550</sub>) and their corresponding acyl-CoA binding protein (ACBP) fused proteins (ACBP-DGAT1<sub>1-550</sub> and ACBP-DGAT1<sub>81-550</sub>) at oleoyl-CoA concentration from 0.1-25  $\mu$ M. Data were fitted to the allosteric sigmoidal equation or a previously proposed kinetic model that accounts for sigmoidicity and substrate inhibition (Xu *et al.*, 2017) using GraphPad Prism. The combined kinetic model is the preferred model for CzDGAT1<sub>1-550</sub>, ACBP-fused CzDGAT1<sub>1-550</sub>, and ACBP-fused CzDGAT1<sub>81-550</sub>, but not CzDGAT1<sub>81-550</sub>. Data represent means  $\pm$  S.D. (n = 3).

**Figure S4. Probing possible self-interaction of CzDGAT1 variants using membrane yeast two-hybrid assay.** DNA sequences encoding CzDGAT1<sub>1-550</sub>, CzDGAT1<sub>81-550</sub> and CzDGAT1<sub>107-550</sub> were ligated to the Lex A- C-terminal fragment of ubiquitin (C<sub>ub</sub>) and the N-terminal fragment of ubiquitin containing an Ile/Gly point mutation (N<sub>ub</sub>G), yielding C<sub>ub</sub>-bait and N<sub>ub</sub>G-prey, respectively. Serial dilutions of yeast cells producing each bait/prey combination were spotted on synthetic drop-out (SD) agar plates lacking Ade, His, Leu and Trp (SD-A-H-L-T).

**Figure S5. Enzyme activity of CzDGAT1 variants in the presence of Coenzyme A (CoA).** The DGAT activities of CzDGAT1<sub>1-550</sub>, and acyl-CoA binding protein (ACBP) fused enzyme (ACBP-DGAT1<sub>1-550</sub>) were assayed at 5  $\mu$ M oleoyl-CoA in the absence or presence of 50  $\mu$ M CoA. Data represent means  $\pm$  S.D. (n = 3).

**Figure S6. Illustration of the N-terminal fusion of acyl-CoA binding protein (ACBP) to CzDGAT1.** The three-dimensional structure of *Arabidopsis thaliana* ACBP6 was generated with the SWISS-MODEL software. *A. thaliana* ACBP6 consists of four  $\alpha$  helices for acyl-CoA binding and is proposed to facilitate the feeding of acyl-CoA to the catalytic pocket of CzDGAT1 via capturing cytosolic acyl-CoAs or acyl-CoAs partitioned into the membrane lipid bilayer and subsequently channeling them to DGAT by proximity.

## Method S1. Membrane yeast two-hybrid assay.

Possible self-interaction of CzDGAT1<sub>1-550</sub> and its N-terminal truncated mutants (CzDGAT1<sub>81-550</sub> and CzDGAT1<sub>107-550</sub>) were tested using the membrane yeast two-hybrid system (kindly provided by Dr. Igor Stagljar, University of Toronto) with the method described by Snider et al. (Snider *et al.*, 2010). Briefly, cDNAs encoding CzDGAT1<sub>1-550</sub>, CzDGAT1<sub>81-550</sub> and CzDGAT1<sub>107-550</sub> were amplified by PCR and cloned into the pBT3N bait vector or pPR3N prey vector, respectively. The pBT3N:bait was then co-transformed with the pPR3N:prey, Ost-N<sub>ub</sub>I ‘positive’ control prey or Ost-N<sub>ub</sub>G ‘negative’ control prey into the yeast strain NMY51 [*MATa*, *his3Δ200*, *trp1-901*, *leu2-3,112*, *ade2*, *LYS2::(lexAop)4-HIS3*, *ura3::(lexAop)8-lacZ*, *ade2::(lexAop)8-ADE2*, *GAL4*]. The possible interaction was then assayed on synthetic drop-out (SD) agar plates lacking Ade, His, Leu and Trp (SD-A-H-L-T) by 1: 10 serial dilution of cell cultures starting from an OD600 value of 0.4.

**Table S1. DGAT1 proteins used for multiple sequence alignment.** The topology organization of DGAT1 was predicted using TMHMM (Krogh *et al.*, 2001). TMD, transmembrane domain.

| Name     | Organism                              | Phytozome/Genbank accession number/JGI protein ID | Length of N-terminus (amino acid residues) | # of TMD |
|----------|---------------------------------------|---------------------------------------------------|--------------------------------------------|----------|
| ApDGAT1  | <i>Auxenochlorella protothecoides</i> | XP_011402032                                      | 326                                        | 7        |
| AtDGAT1  | <i>Arabidopsis thaliana</i>           | NM_127503                                         | 132                                        | 9        |
| BnDGAT1  | <i>Brassica napus</i>                 | JN224473                                          | 113                                        | 8        |
| BtDGAT1  | <i>Bos taurus</i>                     | AAL49962                                          | 83                                         | 9        |
| CaeDGAT1 | <i>Caenorhabditis elegans</i>         | NM_001269372                                      | 70                                         | 9        |
| CheDGAT1 | <i>Chlorella ellipsoidea</i>          | KT779429                                          | 260                                        | 9        |
| CreDGAT1 | <i>Chlamydomonas reinhardtii</i>      | Cre01.g045903                                     | 158                                        | 7        |
| CsDGAT1  | <i>Camelina sativa</i>                | XM_010417066                                      | 132                                        | 9        |
| CsuDGAT1 | <i>Coccomyxa subellipsoidea C-169</i> | 54084                                             | 1                                          | 9        |
| CvDGAT1  | <i>Chlorella vulgaris</i>             | ALP13863.1                                        | 20                                         | 9        |
| CzDGAT1A | <i>Chromochloris zofingiensis</i>     | MH523419                                          | 289                                        | 9        |
| CzDGAT1B | <i>Chromochloris zofingiensis</i>     | Cz09g08290                                        | 107                                        | 9        |
| DmDGAT1  | <i>Drosophila melanogaster</i>        | AF468649                                          | 132                                        | 8        |
| DrDGAT1  | <i>Danio rerio</i>                    | NM_199730                                         | 86                                         | 9        |
| EaDGAT1  | <i>Euonymus alatus</i>                | AY751297                                          | 111                                        | 9        |
| GmDGAT1  | <i>Glycine max</i>                    | AY496439                                          | 102                                        | 9        |
| HaDGAT1  | <i>Helianthus annuus</i>              | HM015632                                          | 110                                        | 9        |
| HsDGAT1  | <i>Homo sapiens</i>                   | NM_012079                                         | 86                                         | 9        |
| JcDGAT1  | <i>Jatropha curcas</i>                | DQ278448                                          | 123                                        | 9        |
| KnDGAT1  | <i>Klebsormidium nitens</i>           | GAQ91878                                          | 260                                        | 9        |
| LuDGAT1  | <i>Linum usitatissimum</i>            | KC485337                                          | 111                                        | 9        |
| MdDGAT1  | <i>Monodelphis domestica</i>          | XM_007488766                                      | 227                                        | 8        |
| MmDGAT1  | <i>Mus musculus</i>                   | AF078752                                          | 95                                         | 9        |
| MtDGAT1  | <i>Medicago truncatula</i>            | XM_003595183                                      | 142                                        | 9        |
| NoDGAT1  | <i>Nannochloropsis oceanica</i>       | KY073295                                          | 29                                         | 9        |
| NtDGAT1  | <i>Nicotiana tabacum</i>              | AF129003                                          | 140                                        | 9        |
| NvDGAT1  | <i>Nematostella vectensis</i>         | XM_001639301                                      | 54                                         | 9        |
| OeDGAT1  | <i>Olea europae</i>                   | AY445635                                          | 136                                        | 9        |
| OsDGAT1  | <i>Oryza sativa</i>                   | NM_001061404                                      | 142                                        | 8        |
| PbDGAT1  | <i>Paracoccidioides brasiliensis</i>  | EEH17170.1                                        | 79                                         | 10       |
| PfDGAT1  | <i>Perilla frutescens</i>             | AF298815                                          | 138                                        | 9        |
| PotDGAT1 | <i>Populus trichocarpa</i>            | XM_006371934                                      | 96                                         | 9        |
| PpDGAT1  | <i>Physcomitrella patens</i>          | XM_001770877                                      | 51                                         | 9        |
| PtDGAT1  | <i>Phaeodactylum tricorutum</i>       | HQ589265                                          | 149                                        | 8        |

|         |                                 |              |     |   |
|---------|---------------------------------|--------------|-----|---|
| RcDGAT1 | <i>Ricinus communis</i>         | NM_001323734 | 128 | 9 |
| RnDGAT1 | <i>Rattus norvegicus</i>        | AB062759     | 97  | 9 |
| SiDGAT1 | <i>Sesamum indicum</i>          | JF499689     | 147 | 9 |
| SsDGAT1 | <i>Sus scrofa</i>               | NM_214051    | 83  | 9 |
| TaDGAT1 | <i>Trichoplax adhaerens</i>     | XM_002111989 | 11  | 9 |
| TgDGAT1 | <i>Toxoplasma gondii</i>        | AY327327     | 117 | 9 |
| TmDGAT1 | <i>Tropaeolum majus</i>         | AY084052     | 124 | 9 |
| TpDGAT1 | <i>Thalassiosira pseudonana</i> | XM_002287179 | 38  | 9 |
| VfDGAT1 | <i>Vernicia fordii</i>          | DQ356680     | 129 | 9 |
| VgDGAT1 | <i>Vernonia galamensis</i>      | EF653276     | 127 | 9 |
| VvDGAT1 | <i>Vitis vinifera</i>           | CAN80418     | 103 | 9 |
| YiDGAT1 | <i>Yarrowia lipolytica</i>      | XM_502557    | 98  | 8 |
| ZmDGAT1 | <i>Zea mays</i>                 | EU039830     | 97  | 8 |

---

**Table S2. Apparent kinetic parameters of CzDGAT1 variants using a combined model accounting for sigmoidicity and substrate inhibition** (Xu *et al.*, 2017). DGAT activity was examined at increasing oleoyl-CoA concentration from 0.1 to 25  $\mu$ M. Data were fitted to a nonlinear regression using a combined model accounting for sigmoidicity and substrate inhibition with the GraphPad Prism software. Data shown are means  $\pm$  S.D. (n=3).

| Enzyme                                        | DGAT1 <sub>1-550</sub> | DGAT1 <sub>81-550</sub> | ACBP-DGAT1 <sub>1-550</sub> | ACBP-DGAT1 <sub>81-550</sub> |
|-----------------------------------------------|------------------------|-------------------------|-----------------------------|------------------------------|
| Preferred model                               | Combined model         | Allosteric sigmoidal    | Combined model              | Combined model               |
| Apparent $V_{\max}$ (pmol TAG/min/mg protein) | 314.20 $\pm$ 16.11     | 16.82 $\pm$ 0.17        | 502.50 $\pm$ 23.75          | 79.38 $\pm$ 27.04            |
| Hill coefficient                              | 1.31 $\pm$ 0.08        | 1.76 $\pm$ 0.06         | 1.72 $\pm$ 0.12             | 1.12 $\pm$ 0.14              |
| Apparent $S_{0.5}$ ( $\mu$ M)                 | 1.76 $\pm$ 0.15        | 1.78 $\pm$ 0.04         | 1.10 $\pm$ 0.08             | 4.76 $\pm$ 2.52              |
| Apparent $K_i$ ( $\mu$ M)                     | 58.74 $\pm$ 11.85      | -                       | 38.44 $\pm$ 7.03            | 9.03 $\pm$ 4.41              |
| Goodness of Fit/R <sup>2</sup>                | 0.992                  | 0.995                   | 0.980                       | 0.961                        |

**Table S3. Primers used in the current study.** A restriction site or linker is shown in **bold and underlined** and a Kozak translation initiation sequence for yeast expression is shown in *italic*.

| Primer name                                                                         | Oligonucleotide sequence                                   |
|-------------------------------------------------------------------------------------|------------------------------------------------------------|
| <b>Primers used for cloning of cDNAs for yeast expression</b>                       |                                                            |
| CzDGAT1 <sub>1-550</sub> -F (to pYES2.1)                                            | gcaga <b><u>GCGGCCGC</u></b> GAAATGGAGGGTGCACGAATC         |
| CzDGAT1-R (to pYES2.1)                                                              | tat <b><u>GTCGAC</u></b> GTGTGACATAAGAGCAGCATTCC           |
| CzDGAT1 <sub>81-550</sub> -F (to pYES2.1)                                           | gcaga <b><u>GCGGCCGC</u></b> GAAATGATTGGCAGCAGTCCTCT       |
| CzDGAT1 <sub>107-550</sub> -F (to pYES2.1)                                          | gcaga <b><u>GCGGCCGC</u></b> GAAATGGATGGACTGGTCAACTTGGC    |
| AtACBP6-F (to pYES2.1)                                                              | gcaga <b><u>GCGGCCGC</u></b> GAAATGGGTTTGAAGGAGGAATTTG     |
| AtACBP6-R (to pYES2.1)                                                              | tat <b><u>GTCGAC</u></b> GGTTGAAGCCTTGGAAGCA               |
| AtACBP6-Linker-R (to pYES2.1)                                                       | <b><u>GAATTC</u></b> CGTTGGTTGAAGCCTTGGAAGCA               |
| Linker-CzDGAT1 <sub>1-550</sub> -F (to pYES2.1)                                     | <b><u>ACGGAATTC</u></b> ATGGAGGGTGCACGAATC                 |
| Linker-CzDGAT1 <sub>81-550</sub> -F (to pYES2.1)                                    | <b><u>ACGGAATTC</u></b> ATGATTGGCAGCAGTCCTCT               |
| Linker-CzDGAT1 <sub>107-550</sub> -F (to pYES2.1)                                   | <b><u>ACGGAATTC</u></b> ATGGATGGACTGGTCAACTTGGC            |
| AtACBP6-F (to pESC-leu2d empty)                                                     | tata <b><u>GGATCC</u></b> GAAATGGGTTTGAAGGAGGAATTTG        |
| AtACBP6-R (to pESC-leu2d empty)                                                     | tata <b><u>CTCGAG</u></b> TCAGGTTGAAGCCTTGGAAGCA           |
| <b>Primers used for cloning of cDNAs for membrane yeast two-hybrid assay (MYTH)</b> |                                                            |
| CzDGAT1 <sub>1-550</sub> -F (to MYTH vector)                                        | ac <b><u>GGCCATTACGGCC</u></b> ATGGAGGGTGCACGAATC          |
| CzDGAT1 <sub>81-550</sub> -F (to MYTH vector)                                       | ac <b><u>GGCCATTACGGCC</u></b> ATGATTGGCAGCAGTCCTCT        |
| CzDGAT1 <sub>107-550</sub> -F (to MYTH vector)                                      | ac <b><u>GGCCATTACGGCC</u></b> ATGGATGGACTGGTCAACTTGGC     |
| CzDGAT1-R (to MYTH vector)                                                          | tat <b><u>GGCCGAGGCGGCC</u></b> TCAGTGTGACATAAGAGCAGCATTCC |
| <b>Primers used for cloning of cDNAs for plant expression</b>                       |                                                            |
| AtWRI-F (to pGreen)                                                                 | CTAG <b><u>ACTAGT</u></b> ATGAAGAAGCGCTTAACCAC             |
| AtWRI-R (to pGreen)                                                                 | CGCT <b><u>CTAGAT</u></b> TCAGACCAAATAGTTACAAGAAAC         |
| AtACBP-F (to pGreen)                                                                | TATA <b><u>ACCGGT</u></b> ATGGGTTTGAAGGAGGAATTTG           |
| AtACBP-R (to pGreen)                                                                | CGCT <b><u>CTAGAT</u></b> TCAGGTTGAAGCCTTGGAAGCA           |
| CzDGAT1 <sub>1-550</sub> -F (to pGreen)                                             | TATA <b><u>ACCGGTACTAGT</u></b> ATGGAGGGTGCACGAATC         |
| CzDGAT1 <sub>81-550</sub> -F (to pGreen)                                            | TATA <b><u>ACCGGT</u></b> ATGATTGGCAGCAGTCCTCT             |
| CzDGAT1 <sub>107-550</sub> -F (to pGreen)                                           | TATA <b><u>ACCGGT</u></b> ATGGATGGACTGGTCAACTTGGC          |
| CzDGAT1-R (to pGreen)                                                               | CGCT <b><u>CTAGAT</u></b> TCAGTGTGACATAAGAGCAGCATTCC       |
| Venus-F (to pGPTVII)                                                                | cgc <b><u>TCTAGA</u></b> ATGGTGAGCAAGGGCGA                 |
| Venus-R (to pGPTVII)                                                                | TATA <b><u>ACTAGTACCGGT</u></b> CTTGTACAGCTCGTCCAT         |
| AtACBP-R (to pGPTVII)                                                               | tata <b><u>CTCGAG</u></b> TCAGGTTGAAGCCTTGGAAGCA           |
| CzDGAT1-R (to pGPTVII)                                                              | tata <b><u>CTCGAG</u></b> TCAGTGTGACATAAGAGCAGCATTCC       |
| Linker-SCFP3A-F (to pGPTVII)                                                        | <b><u>ACGGAATTC</u></b> ATGGTGAGCAAGGGCGAGG                |
| SCFP3A-R (to pGPTVII)                                                               | TATA <b><u>CTCGAG</u></b> TACTTGTACAGCTCGTCCATGCC          |
| AtGPAT9-F (to pGPTVII)                                                              | CGCT <b><u>TCTAGAGTCGAC</u></b> ATGAGCAGTACGGCAGGGAG       |
| AtGPAT9-linker-R (to pGPTVII)                                                       | <b><u>GAATTC</u></b> CGTCTTCTCTTCCAATCTAGCCAGGA            |

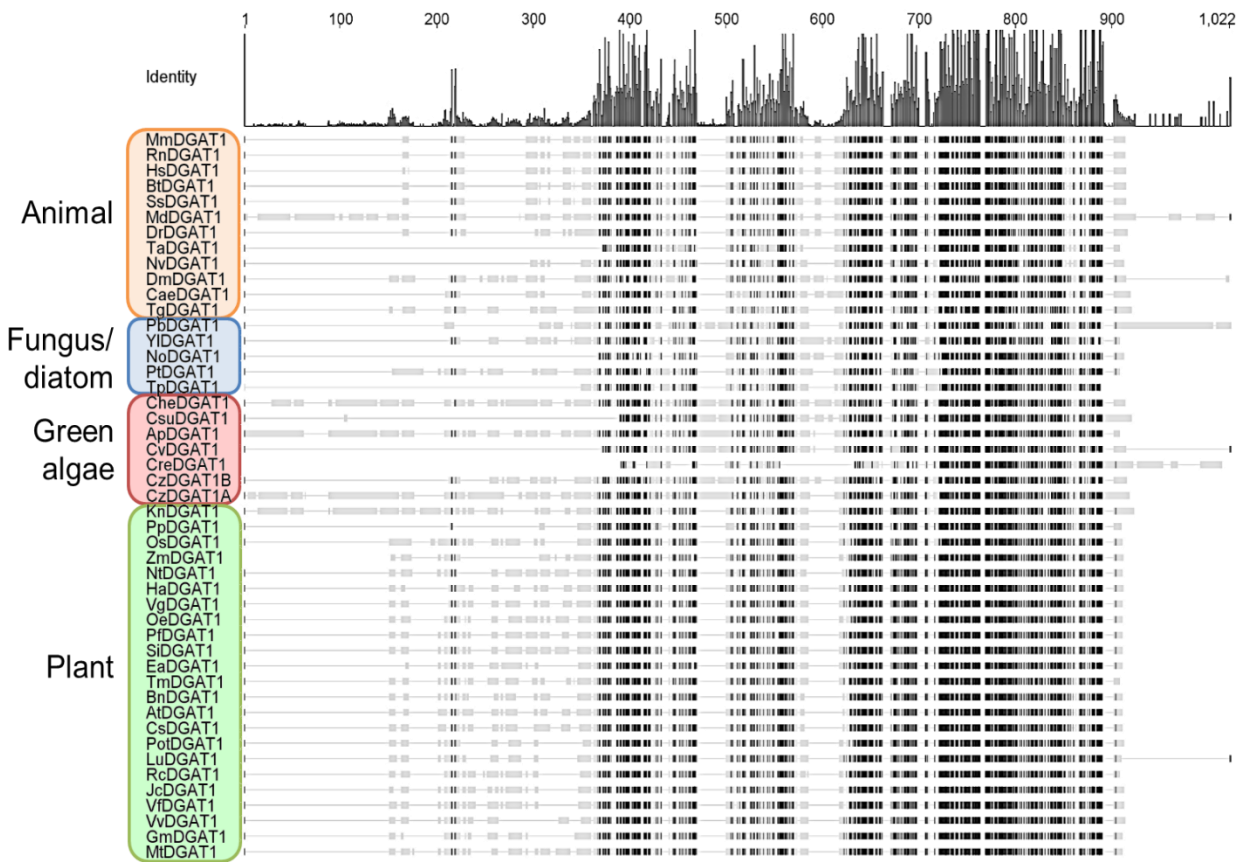

**Figure S1. Alignment of DGAT1 from different species.** Alignment was virtualized by Geneious v5.3 (Drummond *et al.*, 2010).



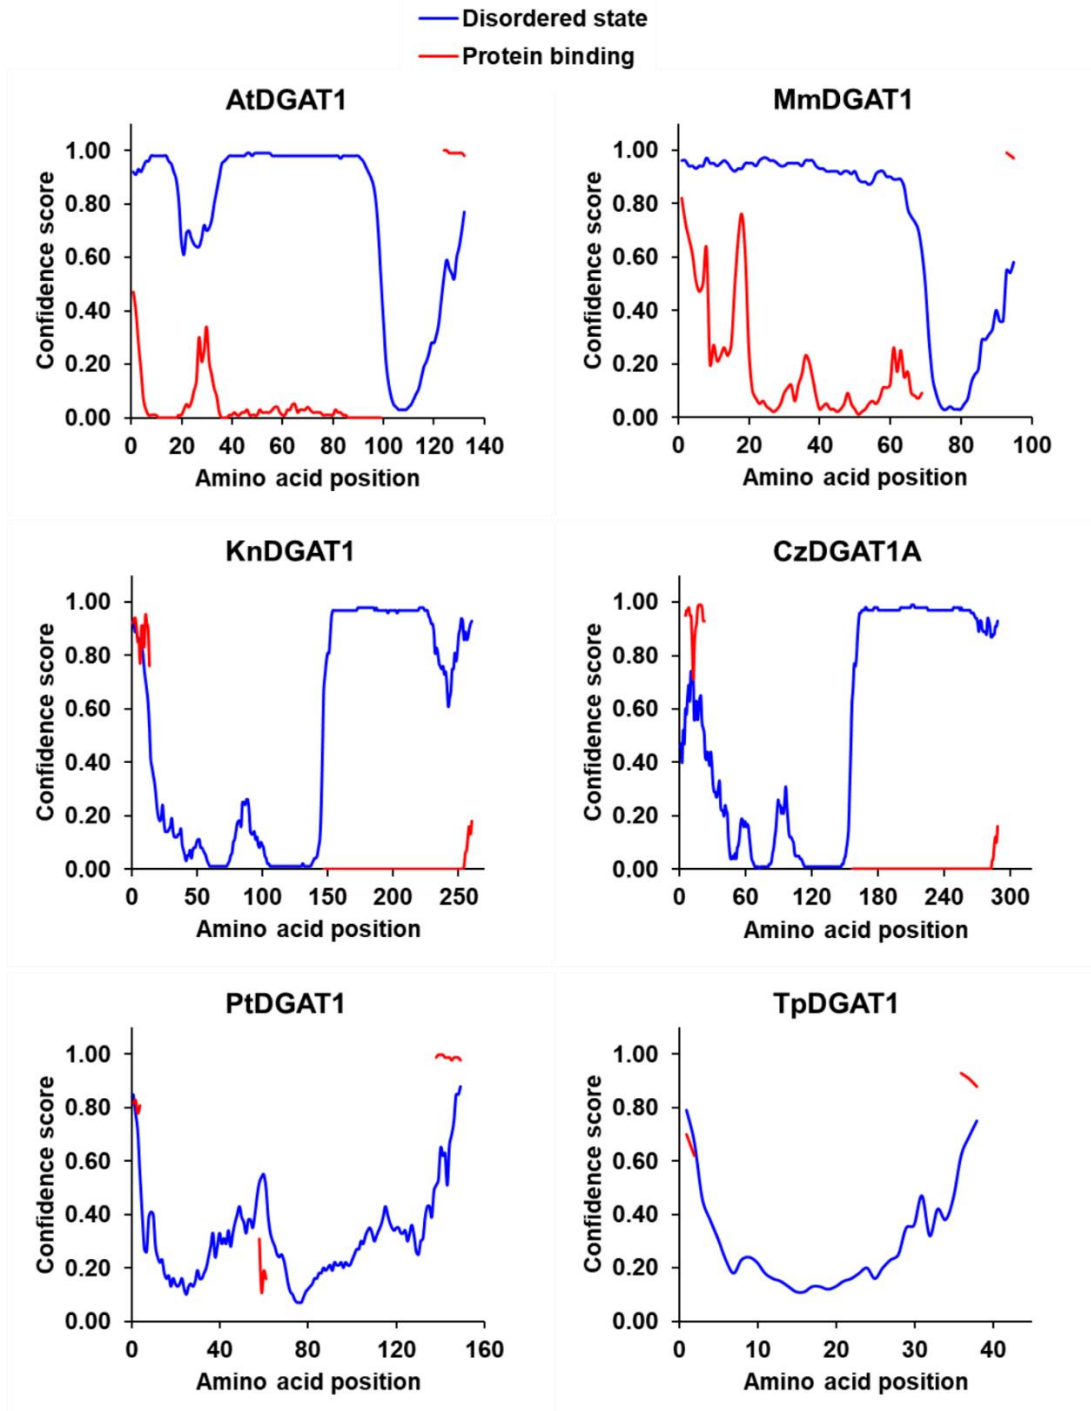

**Figure S2. Prediction of intrinsic disorder profile (blue) of the N-terminal region of DGAT1 from representative algae, plant and animals and its likelihood to participate in protein-protein interaction (red). The analyses were performed by DISOPRED (Ward *et al.*, 2004). *At*, *Arabidopsis thaliana*; *Kn*, *Klebsormidium nitens*; *Cz*, *Chromochloris zofingiensis*; *Pt*, *Phaeodactylum tricornutum*; *Tp*, *Thalassiosira pseudonana*.**

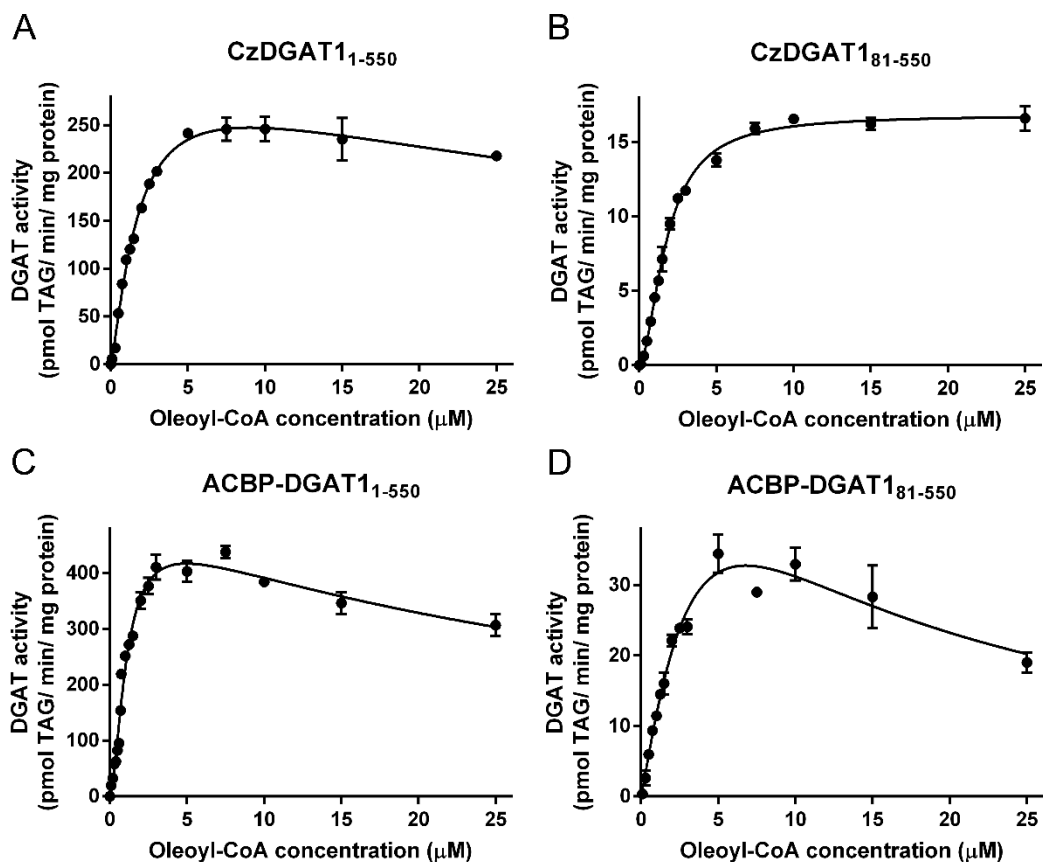

**Figure S3. DGAT activity of CzDGAT1 variant enzymes at high oleoyl-CoA concentrations.** A-D, DGAT activities of the full-length CzDGAT1 (DGAT1<sub>1-550</sub>), N-terminal truncated CzDGAT1 (DGAT1<sub>81-550</sub>) and their corresponding acyl-CoA binding protein (ACBP) fused proteins (ACBP-DGAT1<sub>1-550</sub> and ACBP-DGAT1<sub>81-550</sub>) at oleoyl-CoA concentration from 0.1-25 μM. Data were fitted to the allosteric sigmoidal equation or a previously proposed kinetic model that accounts for sigmoidicity and substrate inhibition (Xu *et al.*, 2017) using GraphPad Prism. The combined kinetic model is the preferred model for CzDGAT1<sub>1-550</sub>, ACBP-fused CzDGAT1<sub>1-550</sub>, and ACBP-fused CzDGAT1<sub>81-550</sub>, but not CzDGAT1<sub>81-550</sub>. Data represent means ± S.D. (n = 3).

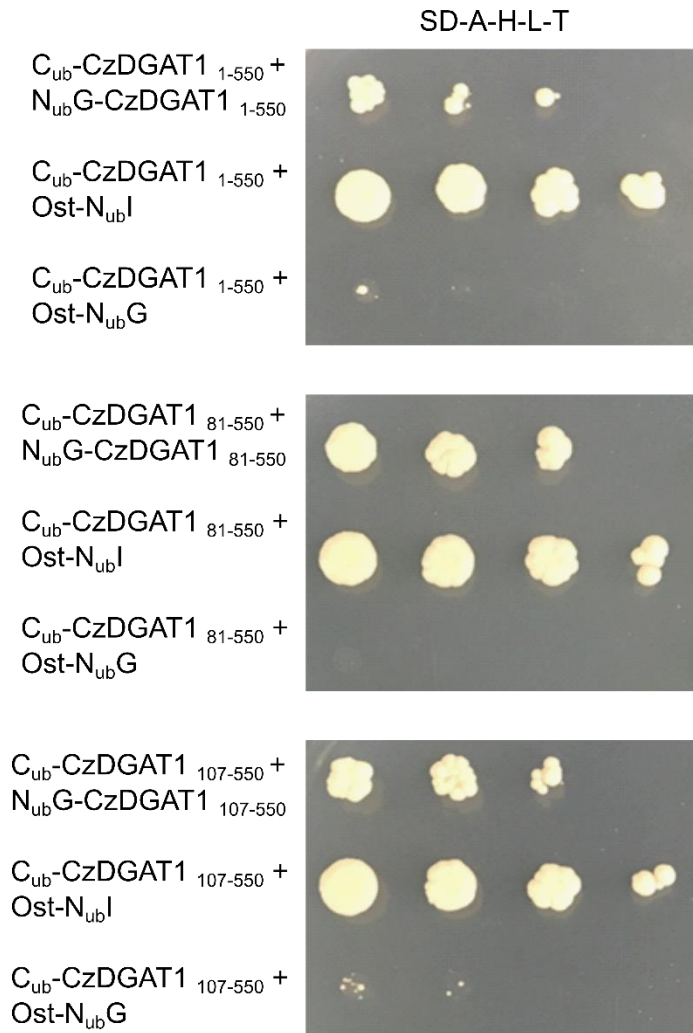

**Figure S4. Probing possible self-interaction of CzDGAT1 variants using membrane yeast two-hybrid assay.** DNA sequences encoding CzDGAT1<sub>1-550</sub>, CzDGAT1<sub>81-550</sub> and CzDGAT1<sub>107-550</sub> were ligated to the Lex A- C-terminal fragment of ubiquitin ( $C_{ub}$ ) and the N-terminal fragment of ubiquitin containing an Ile/Gly point mutation ( $N_{ub}G$ ), yielding  $C_{ub}$ -bait and  $N_{ub}G$ -prey, respectively. Serial dilutions of yeast cells producing each bait/prey combination were spotted on synthetic drop-out (SD) agar plates lacking Ade, His, Leu and Trp (SD-A-H-L-T).

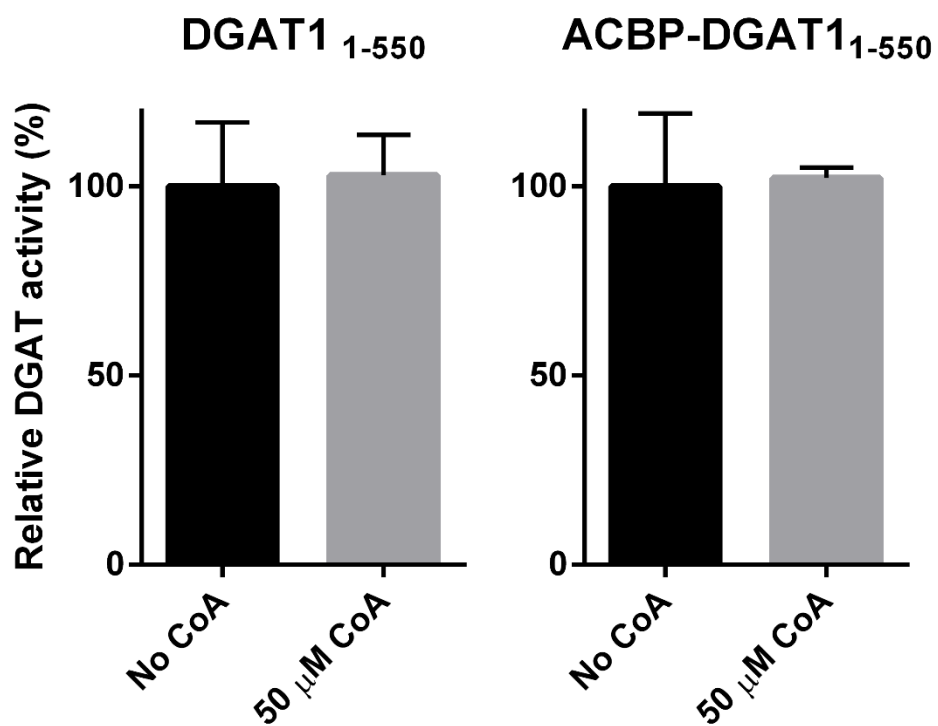

**Figure S5. Enzyme activity of CzDGAT1 variants in the presence of Coenzyme A (CoA).** The DGAT activities of CzDGAT1<sub>1-550</sub>, and acyl-CoA binding protein (ACBP) fused enzyme (ACBP-DGAT1<sub>1-550</sub>) were assayed at 5 μM oleoyl-CoA in the absence or presence of 50 μM CoA. Data represent means ± S.D. (n = 3).

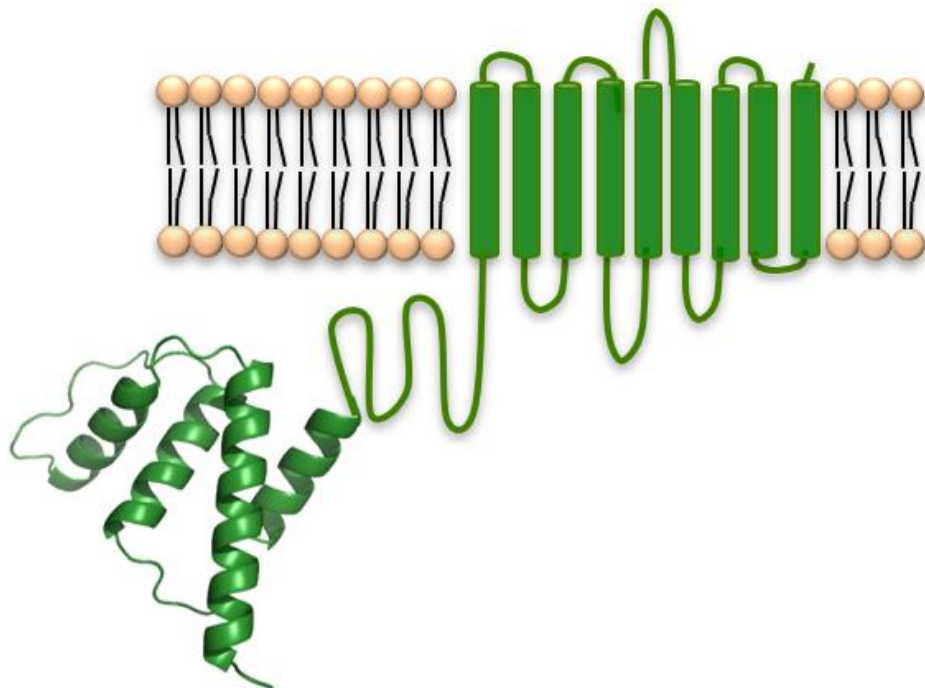

**Figure S6. Illustration of the N-terminal fusion of acyl-CoA binding protein (ACBP) to CzDGAT1.** The three-dimensional structure of *Arabidopsis thaliana* ACBP6 was generated with the SWISS-MODEL software. *A. thaliana* ACBP6 consists of four  $\alpha$  helices for acyl-CoA binding and is proposed to facilitate the feeding of acyl-CoA to the catalytic pocket of CzDGAT1 via capturing cytosolic acyl-CoAs or acyl-CoAs partitioned into the membrane lipid bilayer and subsequently channeling them to DGAT by proximity.

## References:

- Drummond, A., Ashton, B., Buxton, S., et al.** (2010) Geneious v5.3. Available from <http://www.geneious.com> (accessed May 18 2019).
- Krogh, A., Larsson, B., Heijne, G. von and Sonnhammer, E.** (2001) Predicting transmembrane protein topology with a hidden Markov model: Application to complete genomes. *J. Mol. Biol.*, **305**, 567–580.
- Snider, J., Kittanakom, S., Damjanovic, D., Curak, J., Wong, V. and Stagljar, I.** (2010) Detecting interactions with membrane proteins using a membrane two-hybrid assay in yeast. *Nat. Protoc.*, **5**, 1281–1293.
- Ward, J.J., McGuffin, L.J., Bryson, K., Buxton, B.F. and Jones, D.T.** (2004) The DISOPRED server for the prediction of protein disorder. *Bioinformatics*, **20**, 2138–2139.
- Xu, Y., Chen, G., Greer, M.S., et al.** (2017) Multiple mechanisms contribute to increased neutral lipid accumulation in yeast producing recombinant variants of plant diacylglycerol acyltransferase 1. *J. Biol. Chem.*, **292**, 17819–17831.
